## Human melanocyte development and melanoma dedifferentiation at single cell resolution.

Rachel L. Belote<sup>1\*</sup>, Daniel Le<sup>2\*</sup>, Ashley Maynard<sup>3</sup>, Ursula E. Lang<sup>4</sup>, Adriane Sinclair<sup>5</sup>, Vicente Planells-Palop<sup>6</sup>, Laurence Baskin<sup>6</sup>, Aaron D. Tward<sup>6</sup>, Spyros Darmanis<sup>2†</sup> and Robert L. Judson-Torres<sup>1,7,†,‡</sup>

<sup>(1)</sup> Huntsman Cancer Institute, University of Utah, Salt Lake City, UT, USA

<sup>(2)</sup> Department of Microchemistry, Proteomics, Lipidomics and Next Generation Sequencing, Genentech, Inc., South San Francisco, CA, USA.

<sup>(3)</sup> Chan Zuckerberg Biohub, San Francisco, CA, USA

<sup>(4)</sup> Department of Dermatology and Department of Pathology, University of California, San Francisco, CA, USA

<sup>(5)</sup> Department of Urology and Division of Pediatric Urology, University of California, San Francisco, CA, USA

<sup>(6)</sup> Department of Otolaryngology–Head and Neck Surgery, University of California, San Francisco, CA, USA

<sup>(7)</sup> Department of Dermatology, University of Utah, Salt Lake City, UT, USA

### Author list footnotes:

\*These authors contributed equally

† Correspondence: [darmanis@gene.com](mailto:darmanis@gene.com), [judsontorreslab@gmail.com](mailto:judsontorreslab@gmail.com)

‡ Lead contact

### SUMMARY:

In humans, epidermal melanocytes are responsible for skin pigmentation, defense against ultraviolet radiation, and the deadliest common skin cancer, melanoma. While there is substantial overlap in melanocyte development pathways between different model organisms, species dependent differences are frequent and the conservation of these processes in human skin remains unresolved<sup>1–3</sup>. Thus, the biology of developing and adult human melanocytes remains largely uncharacterized. Here, we used a single-cell enrichment and RNA-sequencing pipeline to study human epidermal melanocytes derived directly from skin, capturing transcriptomes across different anatomic sites, developmental age, sexes, and multiple skin tones. Using donor-matched skin from distinct volar and non-volar anatomic locations, we uncovered subpopulations of melanocytes exhibiting site-specific enrichment that occurs during gestation and persists through adulthood. In addition, we identified human melanocyte differentiation transcriptional programs that are distinct from gene signatures generated from model systems. Finally, we use these programs to define patterns of dedifferentiation that are predictive of melanoma prognosis. Overall, the characterization of human melanocytes fresh from skin revealed new subpopulations, human-specific transcriptional programs, and valuable insights into melanoma dedifferentiation.

### INTRODUCTION:

Epidermal melanocytes, the pigment producing cells of human skin, are responsible for skin tone and orchestrate the primary defense against damage from ultraviolet (UV) radiation. Some anatomic site-specific differences in pigmentation are due to environmental factors, such as the tanning response to UV exposure. Others, like the hypopigmentation at volar sites (such as palms and soles), are present at birth. In adult skin, mesenchymal – epithelial interactions are known to influence anatomic site-specific melanocyte survival and pigment production<sup>4</sup> but melanocyte intrinsic factors that contribute to site-specific specialization remain unclear.

Model organisms are powerful tools for investigating melanocyte development. In chick and mouse, a transient, multipotent neural crest cell population gives rise to committed immature melanocyte precursors, called melanoblasts, via two spatially and temporally distinct pathways<sup>2,3</sup>. Such studies focus primarily on melanocytes in skin appendages (hair follicle, feather, and sweat gland). However, despite constituting the predominate subtype in human skin, resident epidermal melanocytes have not been the subject of analogous investigations into developmental trajectories and anatomic-specializations.

Melanocytes can give rise to melanomas which present distinct phenotypic and genomic characteristics correlated with primary tumor location<sup>5,6</sup>. Like many cancers, melanoma progression is coupled to dedifferentiation of the cell of origin<sup>7</sup>. The aggressive nature of melanoma is proposed to be rooted in unique attributes of the melanocytic lineage<sup>8</sup>. Decoding the transcriptome of epidermal melanocytes across the human body during

53 development and in aged skin would provide further insight into the precise origins of melanoma and the  
54 developmental programs reacquired during progression.

55

### 56 **Multi-site scRNA-seq of normal human melanocytes**

57 We performed single cell RNA sequencing (scRNA-seq) on 34 healthy skin specimens across multiple  
58 anatomic locations (leg, arm, foreskin, palm and sole) from 22 donors aged 9.5 fetal weeks (f.w.) to 81 years (Fig.  
59 1a, Supplementary Table 1) representing multiple skin tones and sexes. For each specimen, the epidermis was  
60 enzymatically removed from the dermis and dissociated into a single cell suspension. Since melanocytes comprise  
61 a small fraction of the total epidermal cell mass, FACS was used to increase the capture rate of CKIT+ melanocytes  
62 within the basal layer<sup>9-11</sup> (Fig. 1a, Extended Data Fig. 1a,b, and methods). Sorted cells were then processed using  
63 the Smartseq2 single-cell RNA-seq protocol<sup>12</sup>. After quality control (Extended Data Fig. 1c-e, methods) and iterative  
64 Louvain clustering (see methods), differential expression was used to annotate 9,719 cells into the following cell-  
65 types: melanocytes, keratinocytes, eccrine sweat gland cells, and three immune cell populations (Fig. 1b,c and  
66 Extended Data Fig. 1f-i). Individual cells were then designated as cycling or non-cycling based on expression of  
67 established marker genes (Extended Data Fig. 2a-c)<sup>13</sup>. To further investigate heterogeneity within melanocytes, we  
68 performed Louvain clustering on melanocytes alone. The resulting 10 clusters did not correspond with skin tone,  
69 sex, or donor. Based on the expression of the top 5 differentially expressed genes (DEGs) for each cluster, clusters  
70 were binned into four groups (Extended Data Fig. 3a-d). These groupings corresponded with developmental age  
71 (adult, neonatal, and fetal) as well as a small group of fetal melanocytes expressing established melanocyte stem  
72 cell genes (Fig. 1d and Extended Data Fig. 3f,g). Interestingly, evaluation of donor skin anatomic location presented  
73 volar vs non-volar sites as a possible source of heterogeneity within the adult and fetal groups (Fig. 1e).

74

### 75 **Anatomic site-enriched melanocyte sub-populations**

76 The anatomical location of skin influences melanocyte survival and function but it remains unclear how site-  
77 specific specialization arises during melanocyte maturation<sup>4</sup>. UMAP segregation by anatomic location within the  
78 adult and fetal groups suggested melanocytes exhibit site-specific transcriptomic differences that arise early during  
79 development (Fig. 1e-f). To test this hypothesis, we queried donor matched volar and non-volar cutaneous  
80 specimens that spanned 10 f.w. to 77 years, different sexes, and different skin tones for transcriptional programs  
81 that distinguished volar vs non-volar cutaneous melanocytes across developmental ages (n=6 donors, n=17 skin  
82 specimens, Fig. 2a and Supplementary Table 1,\*). Differential gene expression analysis (Mann-Whitney U test,  
83 Benjamini-Hochberg FDR < 5%) revealed 2,042 transcripts with site-specific expression in both fetal and adult  
84 donors (Fig. 2b-c, Supplementary Table 2). Using binary expression of the top 10 volar and non-volar cutaneous  
85 genes (see methods), we classified individual cells from the full cohort (n=22 donors, n= 34 skin specimens) as volar-  
86 like (v-mel) and non-volar cutaneous-like (c-mel). While v-mels and c-mels were present in all anatomic locations in  
87 both adult and fetal skin (Fig. 1d), v-mels were enriched in volar skin (mean: 94% ± 5% s.d. volar sites, ~7% ± 5 %  
88 non-volar sites) and c-mels were enriched in non-volar cutaneous skin (mean: ~89% ± 9% non-volar sites, 5% ± 5%  
89 volar sites). The presence of melanocytes with a c-mel signature in volar sites and melanocytes with the v-mel  
90 signature in cutaneous sites indicated: 1) two distinct sub-populations of epidermal melanocytes exist in human  
91 skin with anatomic site-specific enrichment, and 2) enrichment occurs during and persists after skin development.  
92 This discovery was validated via RNA FISH and immunofluorescence using the v-mel and c-mel signature genes that  
93 presented a striking level of inverse expression between volar and non-volar cutaneous melanocytes across all  
94 donor-matched skin: *NTRK2* (neurotrophic receptor tyrosine kinase 2) and *HPGD* (15-hydroxyprostaglandin  
95 dehydrogenase), respectively (Fig. 2e-h, Extended Data Fig. 4). These observations further suggest the previously  
96 reported site specific mesenchymal-melanocyte interactions<sup>4,14</sup> that drive the epidermal phenotype in fully-  
97 developed skin, provide more permissive, but non-exclusive, conditions for one melanocyte subpopulation over  
98 another.

99

### 100 **Human-specific melanocyte differentiation programs**

101 We captured three broad developmental ages in our cohort: fetal, neonatal, and adult. Consistent with the  
102 age based UMAP cluster arrangement, both diffusion pseudotime analysis and pairwise differential gene expression  
103 showed a progression from fetal to adult with neonatal melanocytes as an intermediate transcriptional state  
104 (Extended Data Fig. 5 and Supplementary Table 3). Our analyses did not reveal significant further transcriptional  
105 changes associated with donor age in adult melanocytes.

106 To identify gene signatures that best distinguished each human melanocyte developmental group, a  
107 regularized logistic regression model was trained using the single cell transcriptomes from 66% of the dataset  
108 representing the four developmental stages (Fig. 3a). The resultant Developmental stage Melanocyte (DevMel)  
109 model demonstrated excellent classification accuracy when tested on the holdout set, with f1-scores ranging from  
110 0.93-1.00 (Extended Data Fig. 6a). Elastic net regularization yielded genes that collectively constituted  
111 developmental stage-specific expression programs: prg[MSC], prg[FET], prg[NEO] and prg[ADT] (Fig. 3b, Extended  
112 Data Fig. 6b-e and Supplementary Table 4).

113 To benchmark human melanocyte development against known mammalian developmental systems, we  
114 assessed the expression of gene signatures previously defined during mouse melanocyte development<sup>15-18</sup> and *in*  
115 *vitro* differentiation of human ES cells into mature melanocytes<sup>19</sup> within adult (ADT), neonatal (NEO), fetal (FET) and  
116 melanocyte stem cells (MSCs) from c-mel enriched (non-volar cutaneous) skin (Extended Data Fig. 7 and  
117 Supplemental Discussion). Mouse melanocyte cell-type-specific signatures were more highly expressed in FET, NEO,  
118 and ADT melanocytes compared to MSC (p-value < 1e-12, Extended Data Fig. 7b,d). Alternatively, the mouse E14.5  
119 and E17.5 melanoblast-specific signature<sup>16</sup> was most highly expressed in MSC (> 1.5 fold change when compared to  
120 each other group, p-value < 1e-7, Extended Data Fig. 7c), suggesting the MSC cluster is associated with hair follicle  
121 development (see Supplemental Discussion). Consistent with this finding, the CD34+ mouse hair follicle melanocyte  
122 stem cell gene set<sup>20</sup> was most highly expressed in MSC (p-value = 5.4e-38, Extended Data Fig. 7e). Of the *in vitro*  
123 differentiation programs, the mature differentiated melanocyte program was expressed across all developmental  
124 groups with the highest expression in FET, NEO and ADT groups compared to MSC (p-value < 1e-14, Extended Data  
125 Fig. 7f).

126 Comparison of DevMel programs to those identified in mouse or in human *in vitro* differentiation yielded  
127 sparse overlap (Extended Data Fig. 7g-j), indicating that our approach revealed previously unidentified programs  
128 specific to human fetal, neonatal, and adult skin. We therefore sought to determine whether profiles unique to  
129 human *in vivo* development could provide insight into melanoma dedifferentiation and aggression.

130

### 131 **Heterogenous reacquisition of developmental programs during tumorigenesis**

132 Melanoma progression often coincides with the loss of melanocyte differentiation markers and  
133 upregulation of genes associated with earlier stages of development<sup>16,20-23</sup>. This process is broadly described as  
134 dedifferentiation. Given the known substantial cell-to-cell intratumor heterogeneity of melanoma<sup>24</sup>, we reasoned  
135 that single cells within a tumor might occupy various stages of dedifferentiation and that the proportion of cells in  
136 each state potentially influences overall patient outcome. To assess tumor heterogeneity as captured by the  
137 expression of human development-associated programs, we classified published single-cell malignant melanoma  
138 samples<sup>25,26</sup> using our DevMel model (Fig. 3c). We observed inter- and intra-tumor heterogeneity in the  
139 representation of each melanoma group (Fig. 3d), indicating tumors are composed of a mix of dedifferentiated  
140 states in line with our initial hypothesis. Similar to our analysis of model system developmental programs, the  
141 MAL<sup>MSC</sup> melanoma cells corresponded with stem cell-like transcriptional states (invasive, MITF-low, slow cycling)  
142 previously identified in human melanomas (Extended Data Fig. 8b-e, see Supplemental Discussion). In addition, we  
143 observed little developmental group specific enrichment for other reported melanoma signatures amongst the  
144 other MAL groups (Extended Data Fig. 8d). Taken together, these data showed classification of melanoma cells by  
145 human developmental programs generated a unique subdivision of non-stem like states, which could perhaps offer  
146 further insight toward understanding other states of differentiation in melanoma.

147 To better define the course of dedifferentiation during melanoma progression, we looked for differential  
148 gene expression patterns across each of the four MAL groups that were consistent with different forms of cellular  
149 reprogramming: (1) a retrograde unfolding of the differentiation cascade (sequential dedifferentiation)<sup>20</sup>, (2) direct  
150 reprogramming to a more pluripotent stage (direct dedifferentiation), or (3) the acquisition of a melanoma-specific  
151 program (Fig. 3b). Of 511 total unique genes, inclusive of DevMel model variables and MAL group top differentially  
152 expressed genes (Extended Data Fig. 8a, Supplementary Table 5), 45% exhibited expression patterns consistent with  
153 sequential dedifferentiation, in which the relative expression across healthy melanocyte developmental groups was  
154 conserved among MAL groups (Fig. 3d). We found that 3.1% of genes exhibited a direct dedifferentiation pattern,  
155 indicating that expression of these genes may be a prerequisite for disease progression and metastasis (Fig. 3e).  
156 Supporting this interpretation, the small set of genes includes known markers of aggressive melanoma such as AXL  
157 and HMGA2<sup>26,27</sup>. Similarly, recently identified therapeutic resistance programs were evident in both the MSC  
158 healthy and MAL<sup>MSC</sup> populations (Extended Data Figure 8e). We also identified genes expressed in healthy

159 melanocyte groups that were down regulated in all melanoma groups (Fig. 3f), thus characterizing aspects of normal  
160 melanocyte expression that are either non-essential or potentially inhibitory to melanoma progression and/or  
161 metastasis.

162 Finally, 52 highly expressed genes in melanoma were absent from each of the healthy melanocyte  
163 developmental groups (Fig. 3g and Supplementary Table 5). Among the top differentially expressed genes was the  
164 melanoma-associated antigen PRAME, further supporting its use as a melanoma molecular diagnostic. Other of  
165 these “melanoma specific” genes might be important for melanoma progression or diagnosis such as the MTRNR2L  
166 family of transcripts, which encode for short peptides with anti-apoptotic activity<sup>28</sup>, and were highly and exclusively  
167 expressed in all melanoma groups.

### 168 169 **Developmental stage programs predict patient survival**

170 To determine whether gene expression programs characteristic of different human developmental ages  
171 offer prognostic value, we applied CIBERSORT<sup>29</sup> to estimate the fraction of melanoma cells similar to ADT, NEO, FET,  
172 MSC for all skin cutaneous melanoma (SKCM) tumor samples from The Cancer Genome Atlas (TCGA)<sup>30</sup>. Similar to  
173 the single cell melanoma dataset (Fig. 3d), we observed inter-tumor heterogeneity in the fractional representation  
174 of the four developmental groups (Fig. 4a). Hierarchical clustering of SKCM label distributions classified tumor  
175 samples according to the observed predominant developmental group: SKCM<sup>ADT</sup>, SKCM<sup>NEO</sup>, SKCM<sup>FET</sup>, SKCM<sup>MSC</sup>  
176 (Supplementary Table 6). Neither genetic driver nor tumor site correlated with the developmental group  
177 classification of the tumor (Fig 4a; Extended Data Fig. 8f).

178 Using our developmentally-defined subclasses of melanoma tumors, we evaluated the correlation of bulk  
179 tumor differentiation status with patient outcome. As expected, the most differentiated group (SKCM<sup>ADT</sup>) exhibited  
180 best median overall survival (SKCM<sup>ADT</sup> = 11.0 yr vs rest = 5.3 yr). Surprisingly, the most dedifferentiated groups  
181 (SKCM<sup>FET</sup>, SKCM<sup>MSC</sup>) were not associated with worse outcomes (Fig. 4b); rather, the intermediately differentiated  
182 group (SKCM<sup>NEO</sup>) exhibited the shortest median overall survival (SKCM<sup>NEO</sup> = 4.2 yr vs rest = 8.2 yr). To better  
183 understand this unexpected finding, we evaluated the expression of transcriptional programs associated with  
184 clinical response to therapeutics. Indeed, SKCM<sup>NEO</sup> tumors expressed higher levels of transcripts associated with  
185 immune resistance<sup>25</sup> (p-value=1.6e-2, SKCM<sup>NEO</sup> vs rest) and a dearth in immune infiltration signatures<sup>25</sup>(p-  
186 value=5.5e-4, SKCM<sup>NEO</sup> vs rest) as well as FDA-approved therapeutic targets<sup>31</sup> (p-value=1.6e-5, SKCM<sup>NEO</sup> vs rest)  
187 (Extended Data Fig. 8g). The SKCM<sup>MSC</sup> tumor group was unique in its increased expression of FDA-approved  
188 therapeutic targets (p-value=4.6e-21, SKCM<sup>MSC</sup> vs rest). These data are in agreement with previous studies<sup>20,25</sup> and  
189 demonstrate that while some amount of dedifferentiation is associated with worse prognosis, overall survival,  
190 immune evasion and immune resistance are not linearly correlated with dedifferentiation (Fig. 4c). Taken together,  
191 classification using human epidermal melanocyte developmental stage signatures revealed that at least four states  
192 of dedifferentiation constitute individual tumors, and that the proportion of melanocytes that have readopted a  
193 neonatal-like signature is associated with worse prognosis (Fig. 4c-d). The NEO program is not enriched for any  
194 previously identified melanoma transcriptional signature, suggesting its potential as prognostic biomarker remains  
195 untapped (Fig. 4d and Extended Data Fig. 8).

### 196 197 **DISCUSSION:**

198 We have provided a fresh-from-skin human epidermal melanocyte dataset that is, to our knowledge, the  
199 first human cell atlas entry that encompasses human development, sex and diverse race/ethnicities and includes  
200 multiple donor-matched anatomic locations.

201 We identified a novel population of epidermal melanocytes that appear early during human development.  
202 As the predominant class of melanocytes in volar regions, we speculate these v-mels could represent a distinct cell  
203 of origin of acral melanomas - a subtype of melanoma defined by its presentation in these regions and associated  
204 with distinct mutational landscapes and poor therapeutic response and overall survival<sup>32,33</sup>. It is possible epidermal  
205 v-mels are hypopigmented descendants of previously defined sweat gland stem cells<sup>34</sup> and/or v-mels and c-mels  
206 are derived from the two known distinct lineage specification pathways<sup>2</sup>. Here we have provided markers that  
207 permit exploration of these hypotheses in future studies.

208 By characterizing melanoma dedifferentiation using human-specific developmental programs, our work  
209 sheds new light on the relationships among developmental stages, tumor characteristics, and melanoma cell  
210 transcriptional states (Fig. 4c,d). For example, with 63 years as the average age of melanoma diagnosis, our *in situ*  
211 adult melanocyte transcriptome provides a relevant basis for interrogating disease etiology and progression<sup>35</sup>.



212 Moreover, our analyses identified the transcriptional state associated with neonatal melanocytes correlated to  
213 worst overall survival. Due to tissue availability and ease of culture, the neonatal melanocyte transcriptome is often  
214 considered the baseline “normal differentiated program” for comparison to melanoma transcriptomes. This  
215 technical artifact can explain why this program has been previously underappreciated. We further identified  
216 melanoma-specific genes directly acquired in all stages of dedifferentiation (Fig. 3f and Fig. 4d), suggesting that  
217 these genes may undergo positive selection during early metastatic dissemination. Along with the widely-accepted  
218 diagnostic melanoma biomarker PRAME<sup>36</sup> and an established marker of invasion AXL<sup>26</sup>, we identified novel  
219 melanoma-associated genes. Further investigation into the mechanistic roles of these gene sets could reveal novel  
220 drivers of melanoma metastasis.

221 The findings presented here deliver a unique perspective on human melanocyte biology through the  
222 characterization of distinct transcriptional programs specific to development and function. Thus, the transcriptional  
223 programs identified here are valuable for understanding the diversity and malignant transformation of human  
224 melanocytes.

225  
226

#### 227 **ACKNOWLEDGMENTS:**

228 We thank the University of California, San Francisco Biospecimen Resource Program for their help with tissue  
229 acquisition, and Life Science Editors for critical editing of the manuscript. We thank the UCSF Program for  
230 Breakthrough Biomedical Research Sandler Fellows Program (to R.L.JT.) for financial support. We would like to thank  
231 Norma Neff and Michelle Tan for all the help with library quality control and sequencing.

232  
233

#### 233 **AUTHOR CONTRIBUTIONS:**

234 Conceptualization, R.L.B, D.L., A.D.T, S.D., and R.L.JT.; Methodology, R.L.B and A.M.; Validation, R.L.B. and D.L.;  
235 Formal Analysis, R.L.B. and D.L.; Investigation, R.L.B, D.L., and A.M; Resources, U.E.L., A.S., V.PP, L.B., and A.D.T.;  
236 Data Curation: D.L., and A.M.; Writing – Original Draft, R.L.B and R.L.JT.; Writing – Review & Editing, D.L., A.M.,  
237 U.E.L. and S.D.; Visualization, R.L.B. and D.L.; Supervision, S.D. and R.L.JT.; Funding Acquisition, S.D. and R.L.JT.

238  
239

#### 239 **REFERENCES**

- 240 1. Hou, L., Arnheiter, H. & Pavan, W. J. Interspecies difference in the regulation of melanocyte development  
241 by SOX10 and MITF. *Proc. Natl. Acad. Sci. U. S. A.* **103**, 9081–9085 (2006).
- 242 2. Adameyko, I. *et al.* Schwann Cell Precursors from Nerve Innervation Are a Cellular Origin of Melanocytes in  
243 Skin. *Cell* **139**, 366–379 (2009).
- 244 3. Mort, R. L., Jackson, I. J. & Elizabeth Patton, E. The melanocyte lineage in development and disease.  
245 *Development (Cambridge)* vol. 142 620–632 (2015).
- 246 4. Yamaguchi, Y. *et al.* Mesenchymal-epithelial interactions in the skin: Increased expression of dickkopf1 by  
247 palmo-plantar fibroblasts inhibits melanocyte growth and differentiation. *J. Cell Biol.* **165**, 275–285 (2004).
- 248 5. Hayward, N. K. *et al.* Whole-genome landscapes of major melanoma subtypes. *Nature* **545**, 175–180  
249 (2017).
- 250 6. Rabbie, R., Ferguson, P., Molina-Aguilar, C., Adams, D. J. & Robles-Espinoza, C. D. Melanoma subtypes:  
251 genomic profiles, prognostic molecular markers and therapeutic possibilities. *Journal of Pathology* vol. 247  
252 539–551 (2019).
- 253 7. Malta, T. M. *et al.* Machine Learning Identifies Stemness Features Associated with Oncogenic  
254 Dedifferentiation. *Cell* **173**, 338–354.e15 (2018).
- 255 8. Gupta, P. B. *et al.* The melanocyte differentiation program predisposes to metastasis after neoplastic  
256 transformation. *Nat. Genet.* **37**, 1047–1054 (2005).
- 257 9. Belote, R. L. & Simon, S. M. Ca<sup>2+</sup> transients in melanocyte dendrites and dendritic spine-like structures  
258 evoked by cell-to-cell signaling. *J. Cell Biol.* **219**, (2020).
- 259 10. NORRIS, A., TODD, C., GRAHAM, A., QUINN, A. G. & THODY, A. J. The expression of the c-kit receptor by  
260 epidermal melanocytes may be reduced in vitiligo. *Br. J. Dermatol.* **134**, 299–306 (1996).
- 261 11. Randall, V. A., Jenner, T. J., Hibberts, N. A., De Oliveira, I. O. & Vafaei, T. Stem cell factor/c-Kit signalling in  
262 normal and androgenetic alopecia hair follicles. *J. Endocrinol.* **197**, 11–23 (2008).
- 263 12. Picelli, S. *et al.* Smart-seq2 for sensitive full-length transcriptome profiling in single cells. *Nat. Methods* **10**,  
264 1096–1100 (2013).

- 265 13. Hsiao, C. J. *et al.* Characterizing and inferring quantitative cell cycle phase in single-cell RNA-seq data  
266 analysis. *bioRxiv* 526848 (2019) doi:10.1101/526848.
- 267 14. Yamaguchi, Y. *et al.* Epithelial-mesenchymal interactions in wounds: treatment of palmoplantar wounds by  
268 nonpalmoplantar pure epidermal sheet grafts. *Arch. Dermatol.* **137**, 621–8 (2001).
- 269 15. Joshi, S. S. *et al.* CD34 defines melanocyte stem cell subpopulations with distinct regenerative properties.  
270 *PLOS Genet.* **15**, e1008034 (2019).
- 271 16. Marie, K. L. *et al.* Melanoblast transcriptome analysis reveals pathways promoting melanoma metastasis.  
272 *Nat. Commun.* **11**, 1–18 (2020).
- 273 17. Rezza, A. *et al.* Signaling Networks among Stem Cell Precursors, Transit-Amplifying Progenitors, and their  
274 Niche in Developing Hair Follicles. *Cell Rep.* **14**, 3001–3018 (2016).
- 275 18. Sennett, R. *et al.* An Integrated Transcriptome Atlas of Embryonic Hair Follicle Progenitors, Their Niche, and  
276 the Developing Skin. *Dev. Cell* **34**, 577–591 (2015).
- 277 19. Mica, Y., Lee, G., Chambers, S. M., Tomishima, M. J. & Studer, L. Modeling Neural Crest Induction,  
278 Melanocyte Specification, and Disease-Related Pigmentation Defects in hESCs and Patient-Specific iPSCs.  
279 *Cell Rep.* **3**, 1140–1152 (2013).
- 280 20. Tsoi, J. *et al.* Multi-stage Differentiation Defines Melanoma Subtypes with Differential Vulnerability to  
281 Drug-Induced Iron-Dependent Oxidative Stress. *Cancer Cell* **33**, 890-904.e5 (2018).
- 282 21. Hoek, K. S. *et al.* In vivo switching of human melanoma cells between proliferative and invasive states.  
283 *Cancer Res.* **68**, 650–656 (2008).
- 284 22. Richard, G. *et al.* ZEB 1-mediated melanoma cell plasticity enhances resistance to MAPK inhibitors . *EMBO*  
285 *Mol. Med.* **8**, 1143–1161 (2016).
- 286 23. Landsberg, J. *et al.* Melanomas resist T-cell therapy through inflammation-induced reversible  
287 dedifferentiation. *Nature* **490**, 412–416 (2012).
- 288 24. Grzywa, T. M., Paskal, W. & Włodarski, P. K. Intratumor and Intertumor Heterogeneity in Melanoma.  
289 *Translational Oncology* vol. 10 956–975 (2017).
- 290 25. Jerby-Arnon, L. *et al.* A Cancer Cell Program Promotes T Cell Exclusion and Resistance to Checkpoint  
291 Blockade. *Cell* **175**, 984-997.e24 (2018).
- 292 26. Tirosh, I. *et al.* Dissecting the multicellular ecosystem of metastatic melanoma by single-cell RNA-seq.  
293 *Science (80- )*. **352**, 189–196 (2016).
- 294 27. Raskin, L. *et al.* Transcriptome profiling identifies HMGA2 as a biomarker of melanoma progression and  
295 prognosis. *J. Invest. Dermatol.* **133**, 2585–2592 (2013).
- 296 28. Guo, B. *et al.* Humanin peptide suppresses apoptosis by interfering with Bax activation. *Nature* **423**, 456–  
297 461 (2003).
- 298 29. Newman, A. M. *et al.* Robust enumeration of cell subsets from tissue expression profiles. *Nat. Methods* **12**,  
299 453–457 (2015).
- 300 30. Akbani, R. *et al.* Genomic Classification of Cutaneous Melanoma. *Cell* **161**, 1681–1696 (2015).
- 301 31. Wishart, D. S. *et al.* DrugBank 5.0: A major update to the DrugBank database for 2018. *Nucleic Acids Res.*  
302 **46**, D1074–D1082 (2018).
- 303 32. Hayward, N. K. *et al.* Whole-genome landscapes of major melanoma subtypes. *Nature* **545**, 175–180  
304 (2017).
- 305 33. Goydos, J. S. & Shoen, S. L. Acral lentiginous melanoma. in *Cancer Treatment and Research* vol. 167 321–  
306 329 (Kluwer Academic Publishers, 2016).
- 307 34. Okamoto, N. *et al.* A melanocyte-melanoma precursor niche in sweat glands of volar skin. *Pigment Cell*  
308 *Melanoma Res.* **27**, 1039–1050 (2014).
- 309 35. Siegel, R. L., Miller, K. D. & Jemal, A. Cancer statistics, 2020. *CA. Cancer J. Clin.* **70**, 7–30 (2020).
- 310 36. Lezcano, C., Jungbluth, A. A., Nehal, K. S., Hollmann, T. J. & Busam, K. J. PRAME Expression in Melanocytic  
311 Tumors. *Am. J. Surg. Pathol.* **42**, 1456–1465 (2018).
- 312 37. Drey, E. A., Kang, M. S., McFarland, W. & Darney, P. D. Improving the accuracy of fetal foot length to  
313 confirm gestational duration. *Obstet. Gynecol.* **105**, 773–778 (2005).
- 314 38. Dobin, A. *et al.* STAR: Ultrafast universal RNA-seq aligner. *Bioinformatics* **29**, 15–21 (2013).
- 315 39. Anders, S., Pyl, P. T. & Huber, W. HTSeq-A Python framework to work with high-throughput sequencing  
316 data. *Bioinformatics* **31**, 166–169 (2015).
- 317 40. Wolf, F. A., Angerer, P. & Theis, F. J. SCANPY: Large-scale single-cell gene expression data analysis. *Genome*

- 318 *Biol.* **19**, 15 (2018).
- 319 41. Hsiao, C. J. *et al.* Characterizing and inferring quantitative cell cycle phase in single-cell RNA-seq data  
320 analysis. *Genome Res.* **30**, 611–621 (2020).
- 321 42. Liu, J. *et al.* An Integrated TCGA Pan-Cancer Clinical Data Resource to Drive High-Quality Survival Outcome  
322 Analytics. *Cell* **173**, 400–416.e11 (2018).
- 323 43. Gleason, B. C., Crum, C. P. & Murphy, G. F. Expression patterns of MITF during human cutaneous  
324 embryogenesis: Evidence for bulge epithelial expression and persistence of dermal melanoblasts. *J. Cutan.*  
325 *Pathol.* **35**, 615–622 (2008).
- 326 44. Holbrook, K. A., Underwood, R. A., Vogel, A. M., Gown, A. M. & Kimball, H. The appearance, density and  
327 distribution of melanocytes in human embryonic and fetal skin revealed by the anti-melanoma monoclonal  
328 antibody, HMB-45. *Anat. Embryol. (Berl.)*. **180**, 443–455 (1989).
- 329 45. Saxena, N., Mok, K. W. & Rendl, M. An updated classification of hair follicle morphogenesis. *Experimental*  
330 *Dermatology* vol. 28 332–344 (2019).
- 331 46. Nishikawa, S.-I. & Osawa, M. Generating quiescent stem cells. *Pigment cell Res.* **20**, 263–70 (2007).
- 332 47. Denecker, G. *et al.* Identification of a ZEB2-MITF-ZEB1 transcriptional network that controls melanogenesis  
333 and melanoma progression. *Cell Death Differ.* **21**, 1250–61 (2014).
- 334 48. Lu, R. *et al.* Transcription factor TCF4 maintains the properties of human corneal epithelial stem cells. *Stem*  
335 *Cells* **30**, 753–761 (2012).
- 336 49. Li, Z., Li, Y. & Jiao, J. Neural progenitor cells mediated by H2A.Z.2 regulate microglial development via  
337 Cxcl14 in the embryonic brain. *Proc. Natl. Acad. Sci. U. S. A.* **116**, 24122–24132 (2019).
- 338 50. Mica, Y., Lee, G., Chambers, S. M., Tomishima, M. J. & Studer, L. Modeling Neural Crest Induction,  
339 Melanocyte Specification, and Disease-Related Pigmentation Defects in hESCs and Patient-Specific iPSCs.  
340 *Cell Rep.* **3**, 1140–1152 (2013).
- 341 51. Osawa, M. *et al.* Molecular characterization of melanocyte stem cells in their niche. *Development* **132**,  
342 5589–5599 (2005).
- 343 52. Lu, Z. *et al.* Hair follicle stem cells regulate retinoid metabolism to maintain the self-renewal niche for  
344 melanocyte stem cells. *Elife* **9**, (2020).
- 345 53. Widmer, D. S. *et al.* Systematic classification of melanoma cells by phenotype-specific gene expression  
346 mapping. *Pigment Cell Melanoma Res.* **25**, 343–353 (2012).
- 347 54. Strub, T. *et al.* Essential role of microphthalmia transcription factor for DNA replication, mitosis and  
348 genomic stability in melanoma. *Oncogene* **30**, 2319–2332 (2011).
- 349 55. Akbani, R. *et al.* Genomic Classification of Cutaneous Melanoma. *Cell* **161**, 1681–1696 (2015).
- 350 56. Cirenajwis, H. *et al.* Molecular stratification of metastatic melanoma using gene expression profiling -  
351 Prediction of survival outcome and benefit from molecular targeted therapy. *Oncotarget* **6**, 12297–12309  
352 (2015).
- 353 57. Rambow, F. *et al.* Toward Minimal Residual Disease-Directed Therapy in Melanoma. *Cell* **174**, 843-855.e19  
354 (2018).

355  
356  
357  
358  
359  
360  
361  
362  
363  
364  
365  
366  
367  
368  
369  
370

371  
372

Figure 1

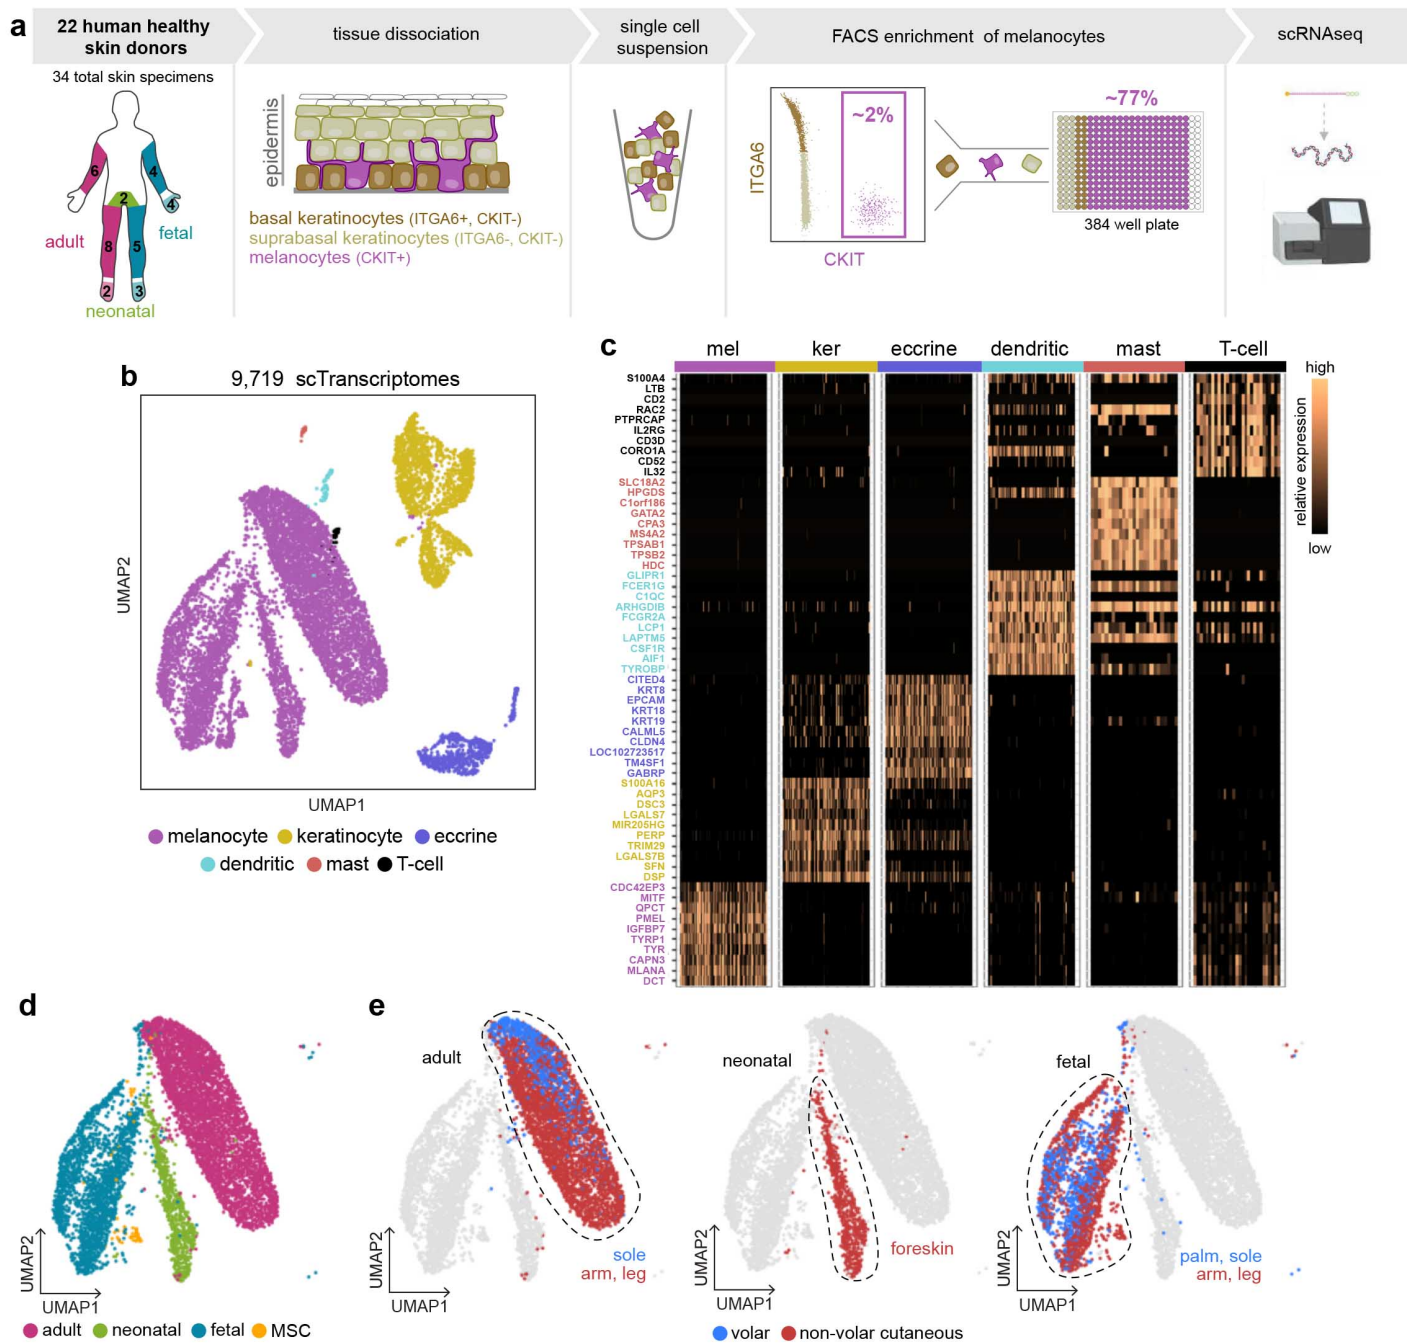

373  
374

**Figure 1: Melanocyte transcriptomic profiles differ based on development and anatomic location. a)** Fresh from healthy human skin single cell isolation, enrichment, and sequencing pipeline. **b)** UMAP visualization of the 9,719 cells (7088 melanocytes, 1865 keratinocytes, 636 eccrine, 76 dendritic, 25 mast, and 29 T-cells) that passed quality control colored by cell types identified from Louvain clustering and candidate genes. **c)** Heat map showing the relative expression of top differentially expressed genes for each cluster in (b). **d)** UMAP of all non-cycling melanocytes with developmental age and fetal MSC annotation based on Louvain clustering (see also Extended Data Fig. 3). **e)** Fetal and adult melanocytes segregate by anatomic location.

382  
383  
384  
385  
386



387  
388

**Figure 2**

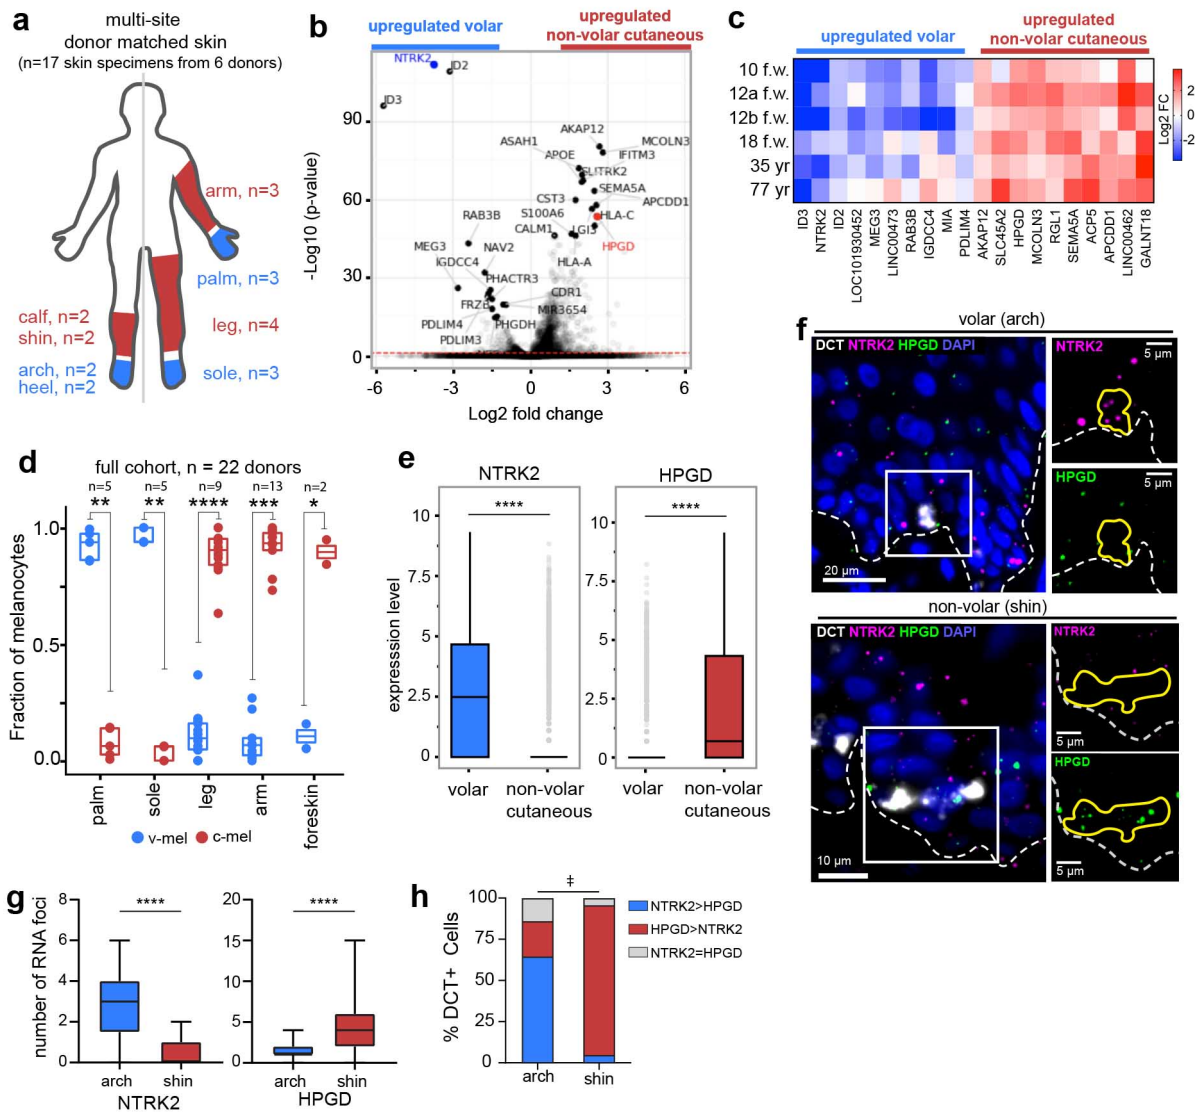

389  
390

**Figure 2: Anatomic site-specific melanocyte sub-population enrichment arises during development and persists in adulthood.** **a)** Schematic illustrating cohort of donor-matched non-volar and volar skin. n = 6 donors and 17 total skin specimens. See also Extended Data Table 1. **b)** Volcano plot of genes enriched in non-volar cutaneous vs volar melanocytes. See also Supplementary Table 2. **c)** Top site-specific differentially expressed genes (DEGs), largest median per-patient log-fold-change between volar and non-volar melanocytes, among donor matched samples. **d)** Fraction of melanocytes with v-mel or c-mel signature in each skin specimen (n= 34) from all 22 patients. Two-sided Mann-Whitney U test with Bonferroni multiple testing correction, \* p-value = 0.12, \*\* p-value <0.01, \*\*\*p-value < 0.001, \*\*\*\*p-value < 0.0001. **e)** Expression level of v-mel gene, *NTRK2*, and c-mel gene, *HPGD*, in volar melanocytes (sole, palm) compared to non-volar cutaneous melanocytes (arm, leg). Two-sided Mann-Whitney U test, \*\*\*\*p-value < 0.0001. Interquartile range with median, standard deviation, and outliers (grey circles). **f)** Representative pseudo-colored fluorescent microscopy images from RNAscope staining for *NTRK2*, *HPGD*, and the melanocyte marker *DCT* in adult volar and non-volar epidermis. Dashed line, epidermal-dermal melanocytes in volar (arch) and non-volar cutaneous skin (shin) in (f). Interquartile range, 5-95%, and outliers. Two-tailed unpaired t-test \*\*\*\*p-value < 0.0001 **h)** The percent v-mel (*NTRK2* > *HPGD*) and c-mel (*HPGD* > *NTRK2*) at each site in (f) showing volar skin has a significantly higher proportion of v-mels compared to non-volar cutaneous skin and non-volar cutaneous skin has a significantly higher proportion of c-mels compared to volar skin ( ‡, Two-sample Z-test for proportions, v-mel: z = 6.062, p-value = 1.8e-11, and c-mel: z = 7.885, p-value = 1.6e-15). For (g) and (h) n= 44 cells from arch and n = 22 cells from shin.

408  
409

410  
411

Figure 3

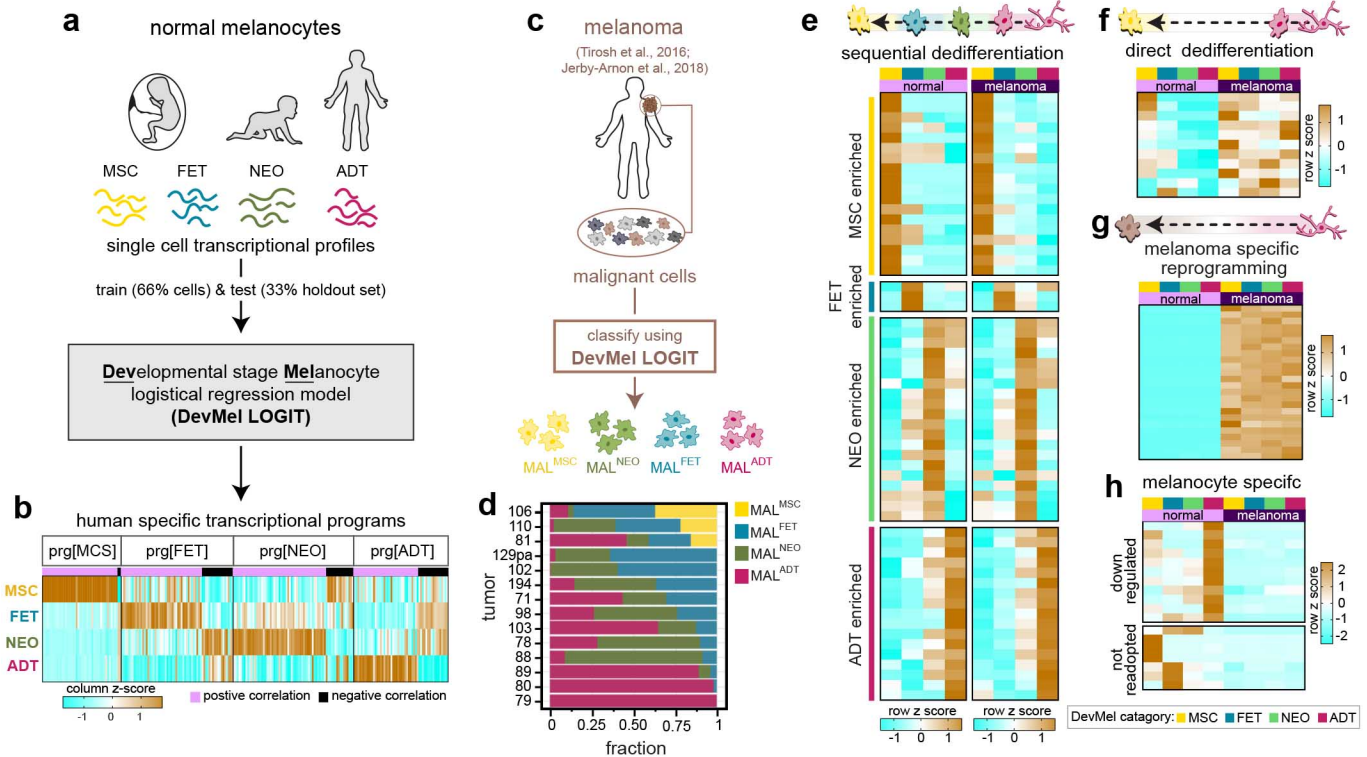

412  
413  
414  
415  
416  
417  
418  
419  
420  
421  
422  
423  
424  
425  
426  
427  
428  
429  
430  
431  
432  
433  
434  
435  
436  
437  
438  
439  
440  
441  
442

**Figure 3: Identification of distinct patterns of developmental programs required in metastasized melanomas.**

**a)** Schematic of the Developmental stage Melanocyte logistical regression model (DevMel LOGIT) used to generate and validate unique transcription profiles for each developmental stage of normal human melanocytes. **b)** Heatmap of the relative expression (column z score) of genes in each DevMel program (prg) from (a). See also Extended Data Fig. 7 and Supplementary Table 4 for gene list. **c)** DevMel LOGIT was used to classify individual melanoma cells by normal melanocyte developmental stages. Every melanoma cell (MAL) was categorized by the predominantly expressed developmental stage program. **d)** Individual tumors are a heterogeneous mix of malignant cells in different dedifferentiation states. Fraction of MAL<sup>ADT</sup>, MAL<sup>NEO</sup>, MAL<sup>FET</sup> and MAL<sup>MSC</sup> cells in each of the 14 tumors analyzed from Tirosh *et al.* and Jerby-Arnon *et al.* in (c). **e-h)** Dedifferentiation can occur through several categories of cancer-associated transcriptional reprogramming: **e)** sequential dedifferentiation, a reverse stepwise unfolding of development; **f)** direct dedifferentiation, direct reacquisition of programs from early developmental stages; **g)** melanoma specific, acquisition of programs not associated with the stages of melanocyte development identified here. **h)** Normal adult developmental stage programs that are lost and earlier developmental stage programs not readopted in metastatic melanoma. Examples of each category are visualized as heatmaps of the relative expression (row z score). See Supplemental Table 5 for complete gene lists.

443  
444

**Figure 4**

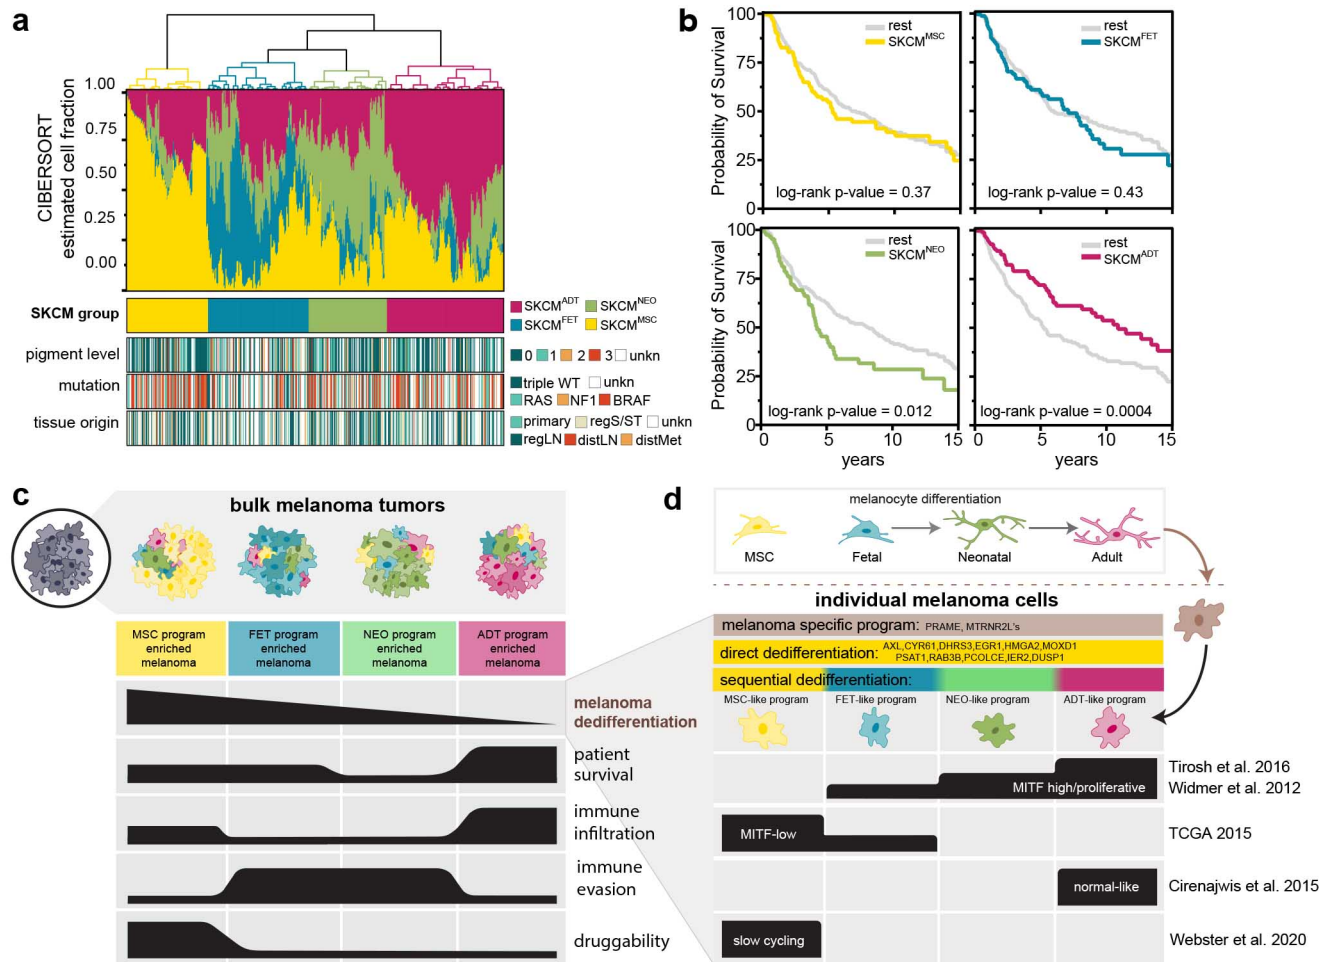

445  
446  
447  
448  
449  
450  
451  
452  
453  
454  
455  
456  
457  
458  
459  
460  
461  
462  
463  
464  
465  
466  
467  
468

**Figure 4: Reacquisition of specific developmental programs in heterogeneous melanoma metastases is prognostic.** **a)** Hierarchical clustering of TCGA SKCM tumors based on fractional composition of normal melanocyte developmental stages assigned using CIBERSORT (top) with clinicopathological features (bottom panels). **b)** Kaplan Meier curves for each SKCM group from (a). Enrichment for cells similar to ADT is associated with increased survival, whereas enrichment for NEO is associated with worse survival. **c-d)** Schematic summarizing the decoding of melanoma dedifferentiation using human developmental programs. **c)** Individual melanoma tumors are comprised of a heterogeneous mix of malignant cells expressing defined melanocyte developmental programs. The fraction of cells expressing each program within the tumor is predictive of overall survival and correlates to signatures of immune infiltration, evasion and potential therapeutic options. **d)** Each melanoma cell can occupy a different degree of dedifferentiation defined by sequential dedifferentiation transcriptional programs (Fig. 3 and Supplementary Table 5). The MSC- and adult-like programs are associated with previously described melanoma signatures whereas the fetal- and neonatal-like programs do not segregate with known melanoma signatures offering unique insight into previously uncharacterized melanoma transcriptional states (Extended Data Fig. 8). Genes common to all cells include melanoma specific genes, such as PRAME, or direct reprogramming to an early developmental stage (direct dedifferentiation).



469  
470

**Extended Data Figure 1**

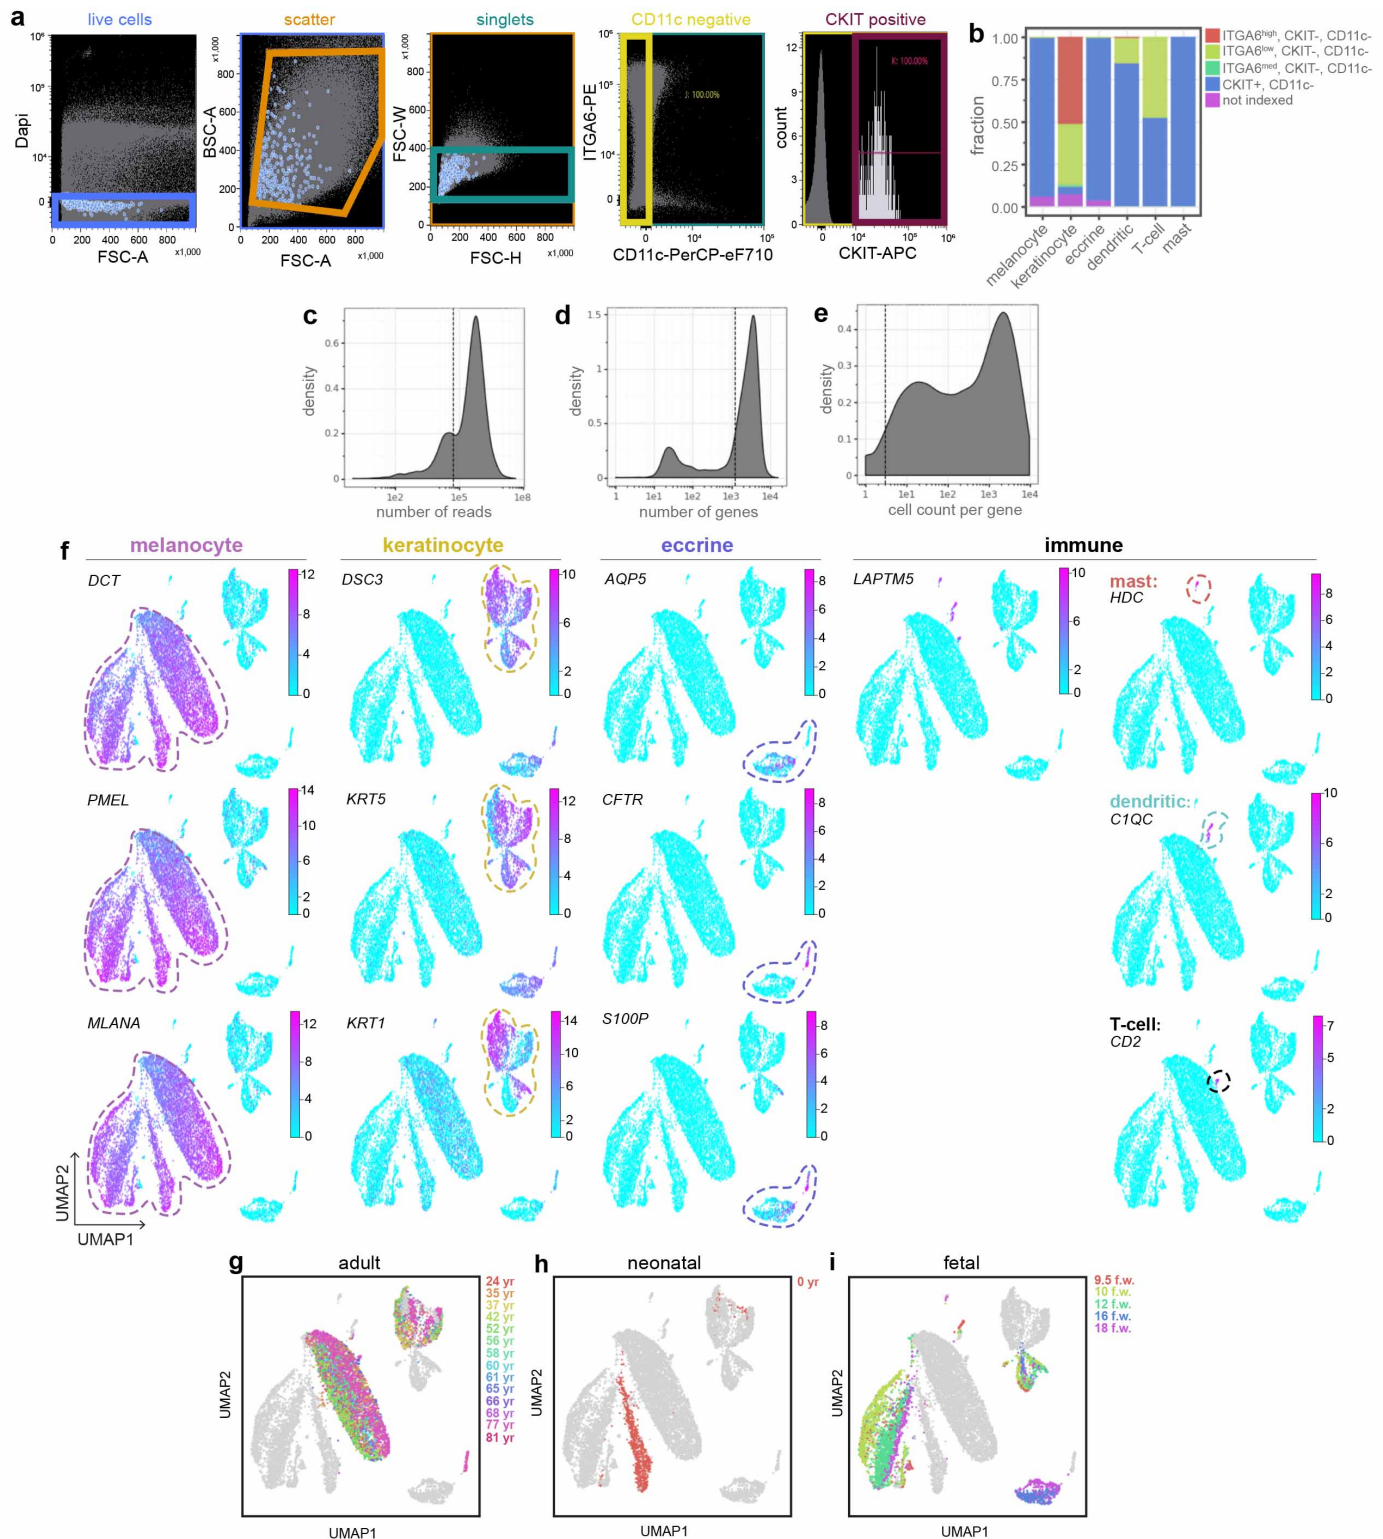

471  
472  
473  
474  
475  
476  
477  
478  
479

**Extended Data Figure 1: Single cell RNA sequencing quality control, cell-type specific markers, and donor age. a)** FACS gate protocol for representative sort. Melanocytes (blue circles in live, scatter, and singlets) were isolated as CKIT+ cells from the CD11c- gate. **b)** Fraction of cells from each indexed FACS gate assignment. **c)** Number of reads and **d)** number of genes per cell for all 14,370 sequenced cells. Dashed line: quality control threshold, cells with < 50,000 reads and < 500 genes were excluded from further analysis. **e)** Genes expressed in more than 3 cells (dashed line) were included for subsequent analysis. **f)** Cell-type specific gene expression overlay on UMAPs. Genes indicated in upper left corner of each plot. **g-i)** UMAP with donor age overlay for **g)** adult, **h)** neonatal, and **i)** fetal cells.



480  
481

## Extended Data Figure 2

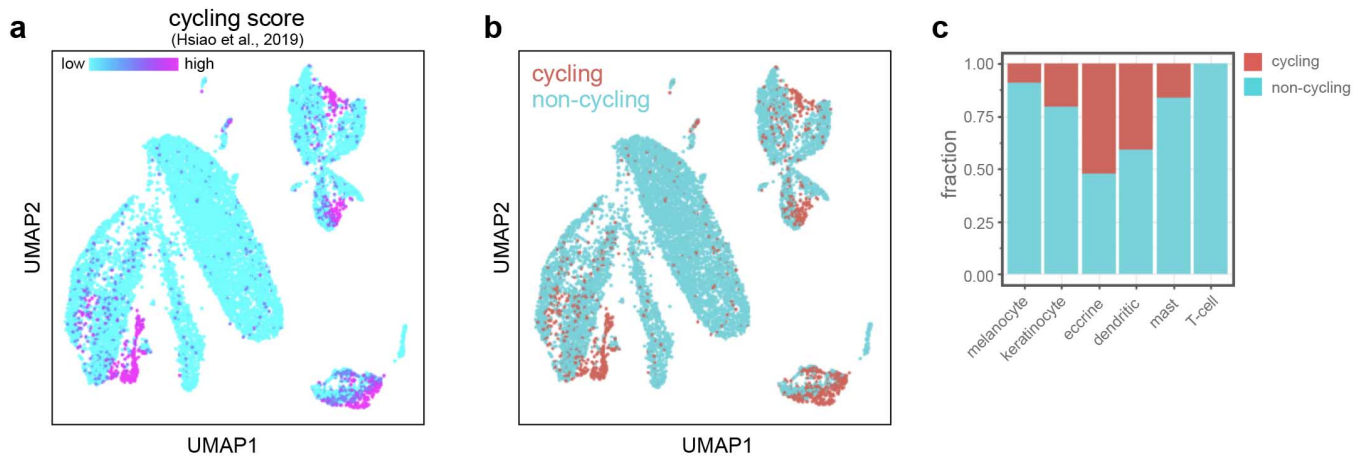

482  
483

**Extended Data Figure 2: Characterization of cell cycle state. a)** UMAP projection of cycling cell program score used to determine which cells were designated as **b)** cycling (blue, in G2 & M phase) vs non-cycling (red). **c)** Fraction of cycling and non-cycling cells for each cell type identified in Fig. 1.

484  
485  
486  
487  
488  
489  
490  
491  
492  
493  
494  
495  
496  
497  
498  
499  
500  
501  
502  
503  
504  
505  
506  
507  
508  
509  
510  
511  
512  
513  
514  
515  
516  
517  
518  
519  
520

521

**Extended Data Figure 3**

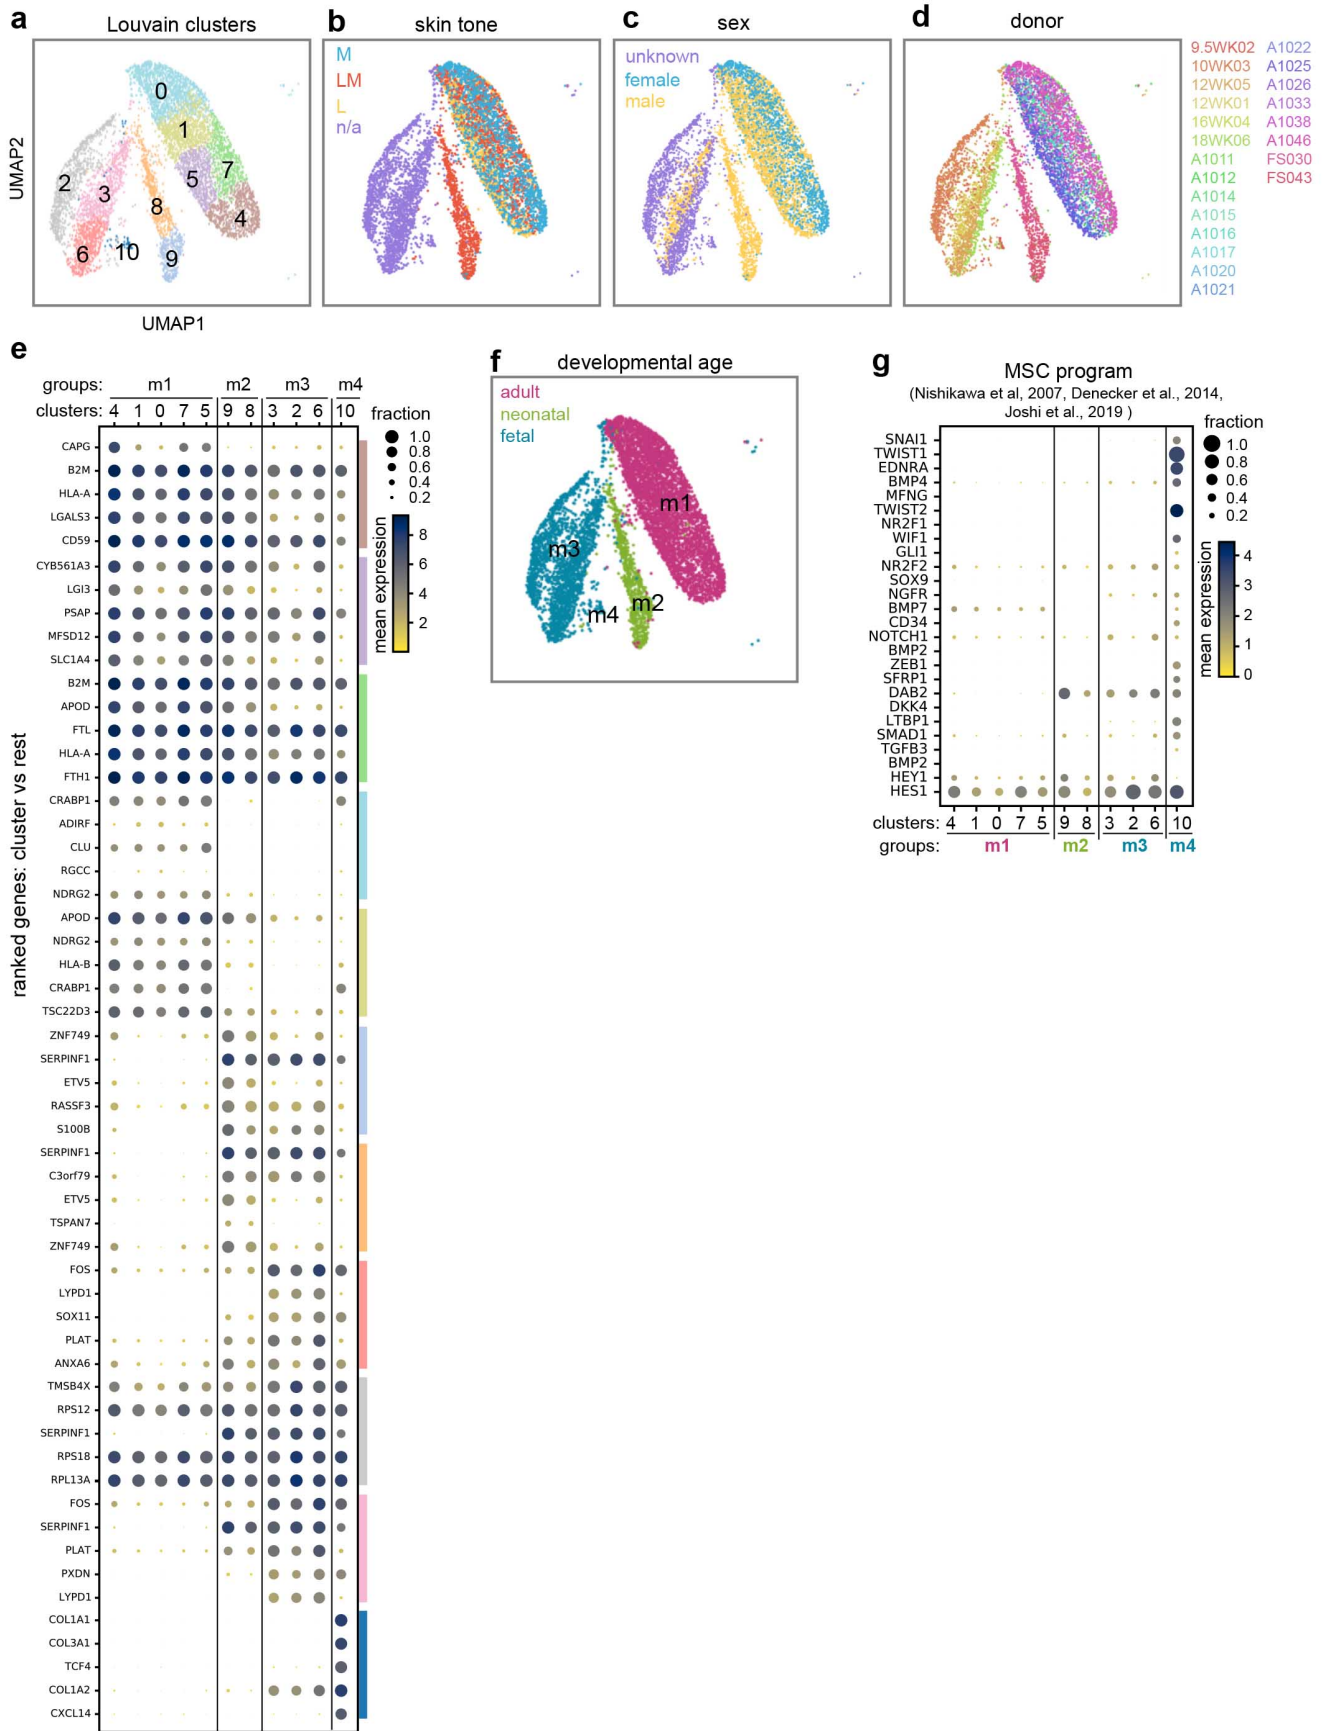

522

523

524

525

**Extended Data Figure 3: Identification and characterization of melanocyte clusters.** a) UMAP of melanocytes showing Louvain clusters do not correspond to b) skin tone, c) sex, or d) donor. e) Dotplot of the mean expression and fraction of cells expressing the top 5 ranked genes (Wilcoxon Rank-sum) for each Louvain cluster in (a). Clusters

526 with similar ranked gene expression patterns were bin into four groups: m1 (clusters 4,1,0,7,5), m2 (clusters 9,8),  
527 m3 (clusters 3,2,6), and m4 (cluster 10). **f)** Group m1 was comprised of adult melanocytes and m2 neonatal  
528 melanocytes, whereas groups m3 and m4 were comprised of fetal melanocytes. **g)** Dotplot showing group m4,  
529 from fetal hair-bearing non-volar cutaneous skin (see Fig. 1e), expresses known melanocyte stem cell (MSC) markers.  
530 Groups are colored by developmental age in (f).

531  
532  
533  
534  
535  
536  
537  
538  
539  
540  
541  
542  
543  
544  
545  
546  
547  
548  
549  
550  
551  
552  
553  
554  
555  
556  
557  
558  
559  
560  
561  
562  
563  
564  
565  
566  
567  
568  
569  
570  
571  
572  
573  
574  
575  
576  
577  
578

579  
580

## Extended Data Figure 4

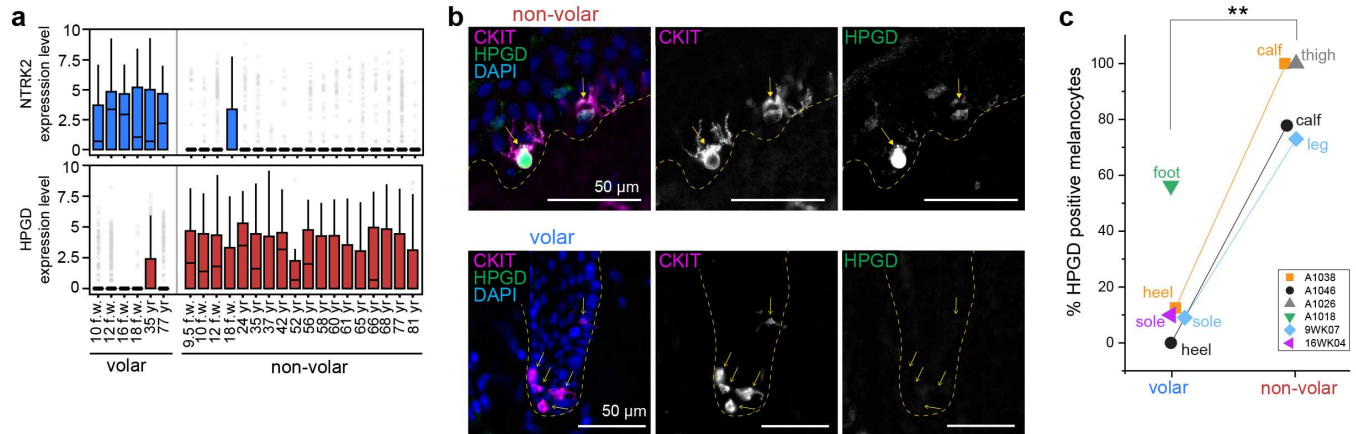

581  
582  
583  
584  
585  
586  
587  
588  
589  
590  
591  
592  
593  
594  
595  
596  
597  
598  
599  
600  
601  
602  
603  
604  
605  
606  
607  
608  
609  
610  
611  
612  
613  
614  
615  
616  
617  
618  
619  
620

### Extended Data Figure 4: Validation of v-mel and c-mel site-specific enrichment in adult and fetal skin.

**a)** Expression level of v-mel gene, *NTRK2*, and c-mel gene, *HPGD*, in volar melanocytes compared to non-volar cutaneous melanocytes at each age (n=22 donors). Interquartile range with median, standard deviation, and outliers (grey circles). **b)** Immunofluorescence co-staining of adult volar and non-volar skin cryo-sections with the c-mel marker *HPGD* (green) and melanocyte marker *CKIT* (magenta). Dashed line, epidermal-dermal junction. **c)** Quantification of site-specific enrichment of melanocyte c-mel and v-mel subclasses. Percent *HPGD* positive melanocytes per donor volar and non-volar skin. Adult skin: A1046, n=78 total cells; A1038, n = 39 total cells; A1018, n = 48 total cells; A1026, n= 15 total cells. Fetal skin: 9WK07, n= 41 total cells; 16WK04, n = 10 total cells. Two-tailed unpaired t-test, \*\* p-value = 0.001.



621  
622

**Extended Data Figure 5**

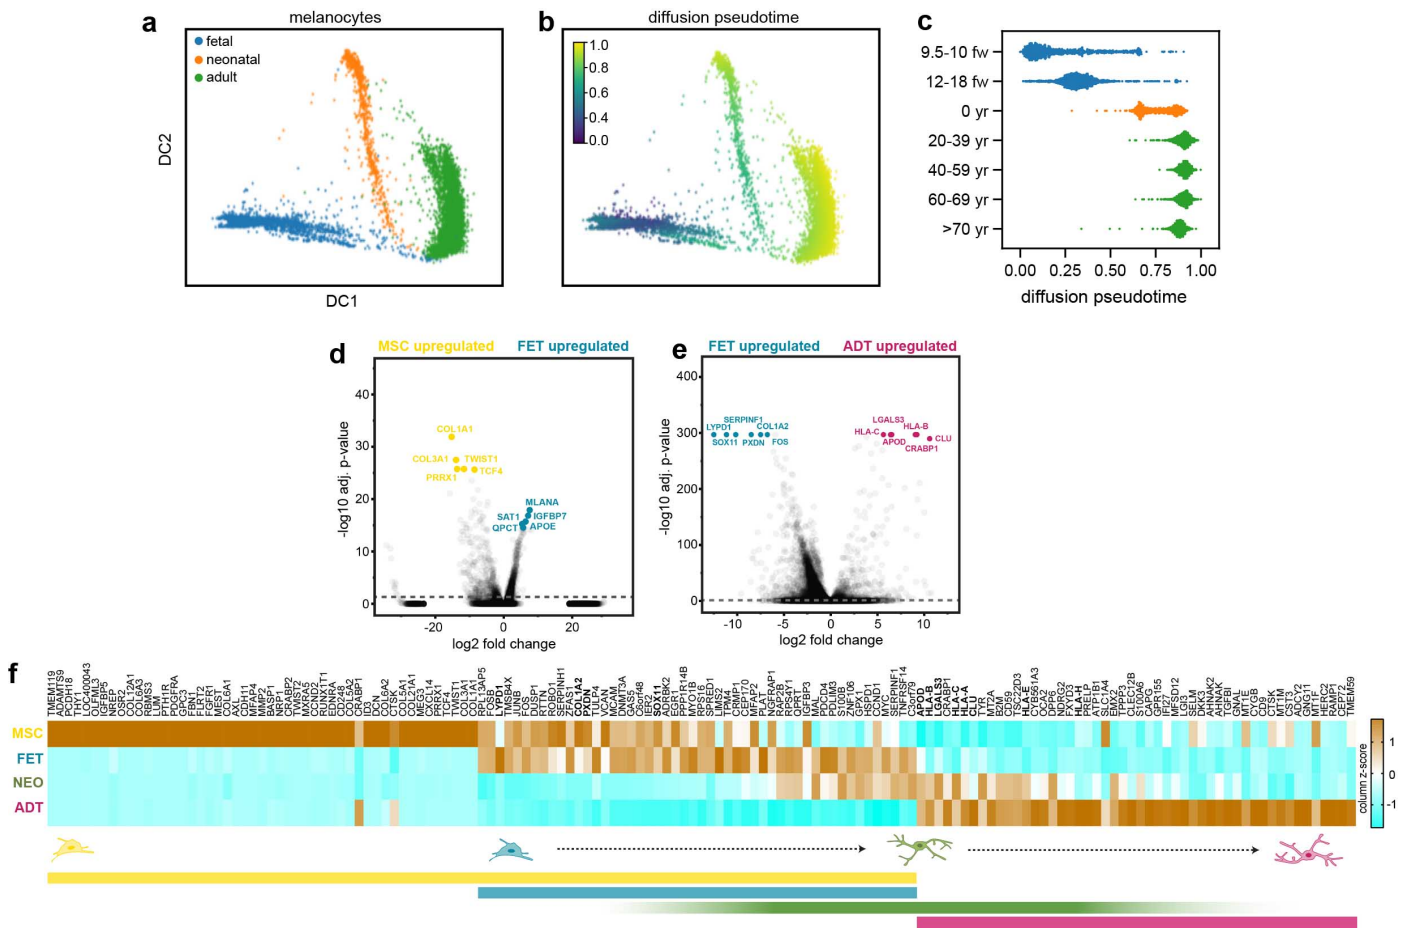

623  
624  
625  
626  
627  
628  
629  
630  
631  
632  
633  
634  
635  
636  
637  
638  
639  
640  
641  
642  
643  
644  
645  
646  
647  
648

**Extended Data Figure 5: Pseudotime and pairwise differential expression analysis of developmental ages and groups.** **a)** Melanocytes cluster by developmental age in diffusion component space DC1 and DC2. **b)** Pseudotime overlay onto DC space. **c)** Progression from fetal to adult through an intermediate neonatal transcriptional state. **d)** Volcano plot showing the top ten DEGs between MSC (yellow) and FET (teal) non-volar cutaneous melanocyte populations. **e)** Volcano plot showing the top ten DEGs between FET (teal) and ADT (magenta) non-volar cutaneous melanocytes. **f)** Heatmap visualization of the relative expression (column z score) of DEGs from (d) and (e) for all four non-volar cutaneous developmental groups. Both MSC and FET were enriched for known developmental genes (SOX11, LYPD1) and genes involved in extracellular matrix establishment/remodeling (COL1A2, PXDN). The ADT group expressed genes involved in innate immunity, inflammation and regulating apoptosis/cell stress in other cell types and tissues (HLAs, APOD, CLU, LGALS3). The NEO group exhibited high expression of a subset of genes from both the FET and ADT stages, consistent with neonatal melanocytes being an intermediate developmental state. See Supplementary Table 3 for the full list.

649  
650

## Extended Data Figure 6

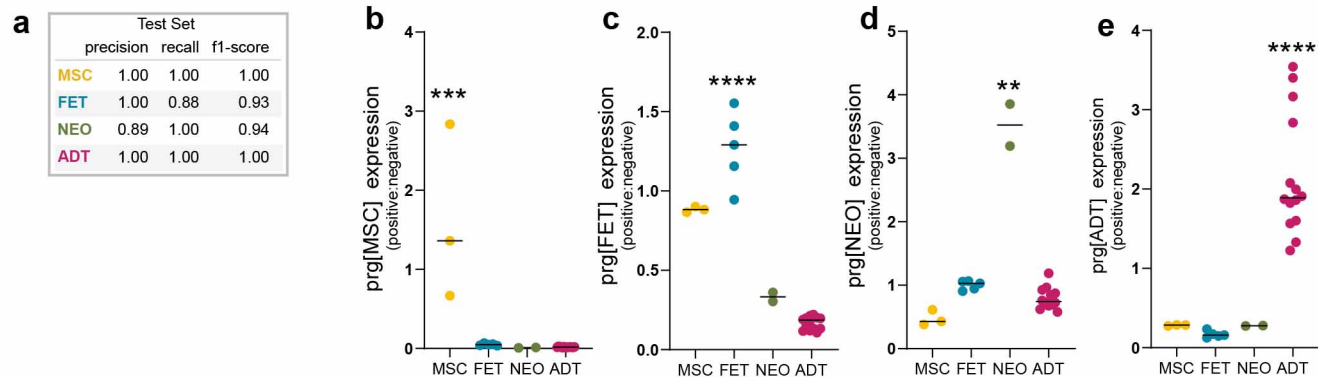

651  
652

**Extended Data Figure 6: Transcriptional profiling of human melanocyte differentiation. a)** DevMel LOGIT classifier performance on hold out validation set. **b-e)** DevMel program expression is highly expressed by cells from all skin donors within each corresponding developmental stage. Program expression for each donor (black line, average) is the ratio of the mean expression of positively correlated genes and negatively correlated genes. Significant by one-sided Mann Whitney U test. **b)** prg[MSC]: MSC vs rest \*\*\* p-value = 0.0005, **c)** prg[FET]: FET vs rest \*\*\*\* p-value 0.0001, **d)** prg[NEO]: FET vs rest \*\* p-value = 0.0072, **e)** prg[ADT]: ADT vs rest \*\*\*\* p-value < 0.0001.

659  
660  
661  
662  
663  
664  
665  
666  
667  
668  
669  
670  
671  
672  
673  
674  
675  
676  
677  
678  
679  
680  
681  
682  
683  
684  
685  
686  
687  
688  
689  
690  
691

692  
693

Extended Data Figure 7

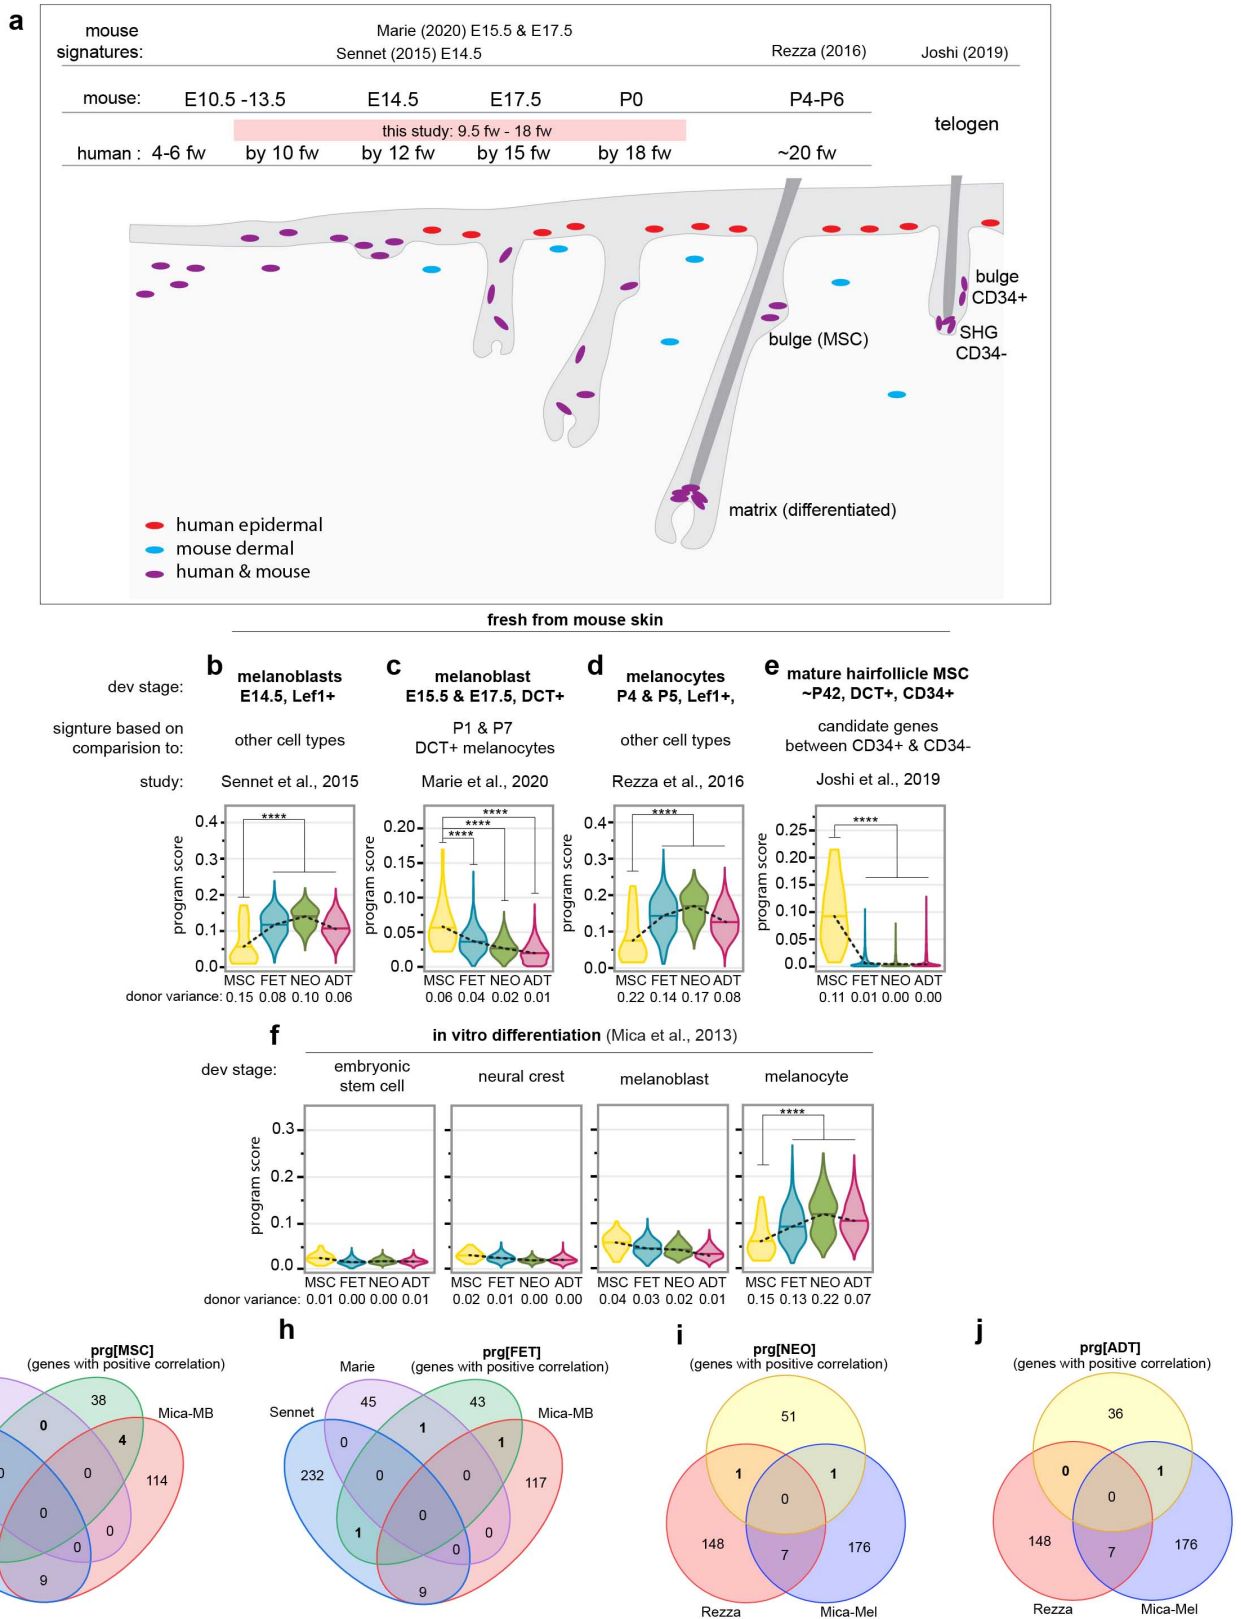

694  
695  
696  
697  
698  
699  
700

**Extended Data Figure 7: Evaluation of model mammalian melanocyte developmental program expression in human non-volar cutaneous melanocyte developmental groups.** **a)** Schematic summarizing human<sup>43,44</sup> and corresponding mouse<sup>45</sup> melanocyte development captured in this study's dataset. In hair-bearing skin, both humans and mice develop follicular melanocytes (purple). Mice retain a dermal melanocyte population (blue) in fully developed skin, whereas humans develop resident epidermal melanocytes (red) within the skin at all anatomic locations. **b-f)** Violin plots show distribution of indicated transcriptional program expression scores for individual

701 cells within each developmental group MSC, FET, NEO, and ADT. Dashed line: mean expression. Program scores  
702 were generated from published signatures of **b-c**) mouse melanoblasts (cell committed to the melanocyte fate)<sup>16,18</sup>,  
703 **d**) melanocytes<sup>17</sup>, and **e**) melanocyte stem cells from mature hair follicles in adult mice<sup>15</sup> and **f**) *in vitro* melanocyte  
704 differentiation stages. For each individual cell, the program score is the mean normalized expression for all genes  
705 in the indicated published gene signature. The variance of the average program expression among donors within  
706 the MSC, FET, NEO, and ADT groups (reported below the corresponding group for each violin plot) was low showing  
707 concordance across ages within each group. \*\*\*\* p-value < 1 x 10<sup>-7</sup>, significance determined by one-sided Man-  
708 Whitney U test. **g-h**) Venn diagrams showing the number of unique and overlapping genes of melanoblast related  
709 gene signatures with the positive correlated component of the DevMel profiles **g**) prg[MSC] and **h**) prg[FET]. **i-j**)  
710 Venn diagrams showing the number of unique and overlapping genes of differentiated melanocyte related gene  
711 signatures with the positively correlated component of the DevMel profiles **i**) prg[NEO] and **j**) prg[ADT].  
712  
713  
714  
715  
716  
717  
718  
719  
720  
721  
722  
723  
724  
725  
726  
727  
728  
729  
730  
731  
732  
733  
734  
735  
736  
737  
738  
739  
740  
741  
742  
743  
744  
745  
746  
747  
748  
749  
750  
751  
752  
753



754  
755

## Extended Data Figure 8

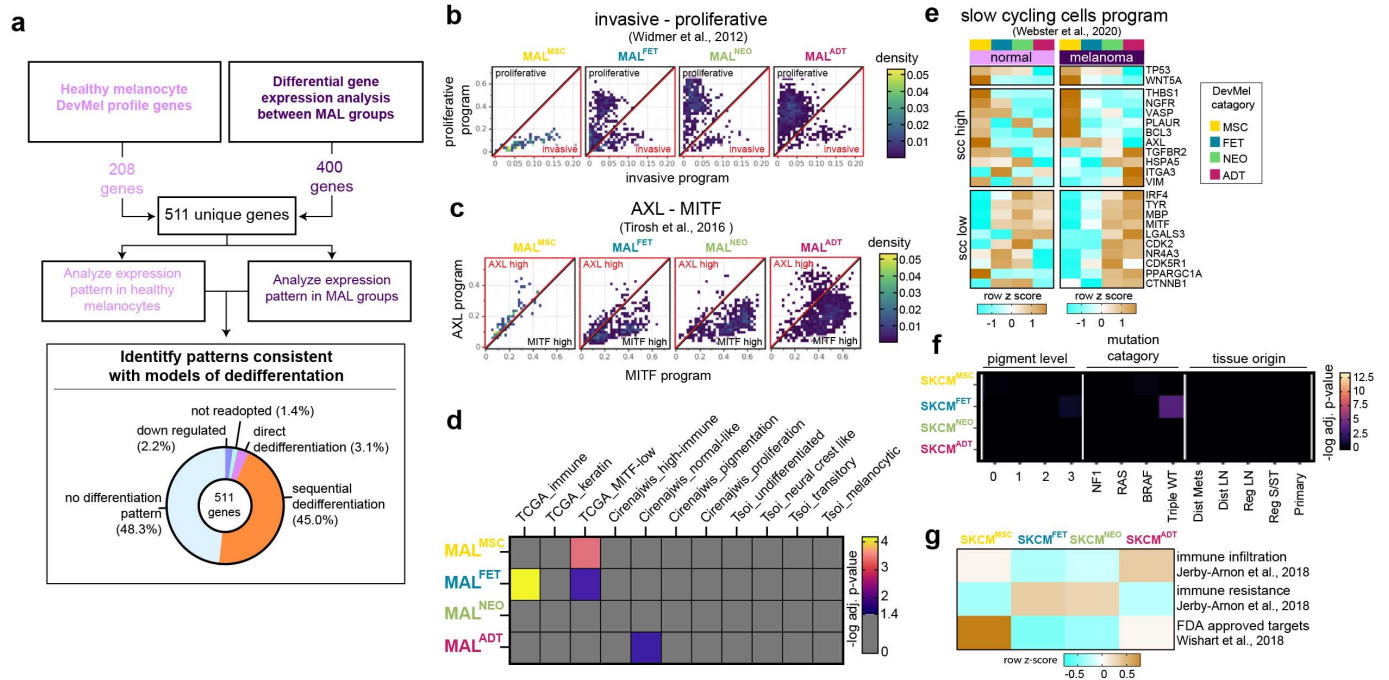

756  
757

**Extended Data Figure 8: Characterization of melanoma cells and tumors classified by *in situ* human melanocyte developmental programs.** **a)** Workflow to generate gene set (511 unique genes) used to identify patterns associated with melanoma dedifferentiation (top). Percent of genes across MAL groups that exhibit patterns consistent with dedifferentiation categories in Fig. 3e-g. **b-c)** Density plots showing the expression of **b)** the Widmer *et al.* invasive and proliferative programs and **c)** the Tirosh *et al.* AXL and MITF programs for individual cells in MAL<sup>ADT</sup>, MAL<sup>NEO</sup>, MAL<sup>FET</sup> and MAL<sup>MSC</sup> groups. **d)** Pairwise Fisher exact test showing negative log<sub>10</sub> adjusted p-values for the gene set enrichment analysis conducted for TCGA *et al.*, 2015, Cirenajwis *et al.*, 2015 and Tsoi *et al.*, 2018 gene signatures. **e)** Heatmap showing the relative expression levels (row z score) of WNT5A high, TP53 high slow cycling cell associated genes in each normal melanocyte and MAL developmental group. **f)** Pairwise Fisher exact test showing negative log<sub>10</sub> adjusted p-values for clinicopathological feature and transcriptional categorization within each SKCM group (SKCM<sup>ADT</sup>, SKCM<sup>NEO</sup>, SKCM<sup>FET</sup>, SKCM<sup>MSC</sup>). There is little to no difference in the enrichment of pigment level, mutation category, or tissue origin between SKCM groups in Figure 4. **g)** Heatmap showing the relative expression levels (row z-score) of immune infiltration program, immune evasion program and FDA-approved therapeutic targets in SKCM groups.

772  
773  
774  
775  
776  
777  
778  
779  
780  
781  
782  
783  
784  
785  
786  
787  
788

789 **SUPPLEMENTARY INFORMATION:**

790

791 **SUPPLEMENTAL DISCUSSION**

792 **Supplemental discussion related to Extended Data Figure 3.**

793 The single cell isolation procedure for adult skin was optimized for CKIT+ interfollicular epidermal  
794 melanocytes; thus, we expected exclusion of CKIT negative/low follicular melanocyte stem cells (MSC) (see  
795 methods). We therefore assessed the expression of known MSC genes<sup>15,46,47</sup> in each cluster. The lack of expression  
796 for known follicular melanocyte stem cell (MSC) genes in group m1 (Extended Data Fig. 3g) suggests the strategy  
797 was successful in the adult skin. While, it is possible that CKIT+ differentiated follicular melanocytes were captured,  
798 they were not transcriptionally distinct from epidermal melanocytes. In contrast, two of the top 5 ranked genes for  
799 group m4, TC4F<sup>48</sup> and CXCL14<sup>49</sup> are associated with stem- and progenitor- cell function, suggesting MSCs were  
800 captured from fetal hair-bearing, non-volar cutaneous skin (Fig. 1e and Supplemental Table 1, leg and arm).  
801 Consistent with this hypothesis, the putative MSC group expressed many of the known MSC genes unlike the other  
802 fetal, neonatal and adult clusters (Extended Data Fig. 3g).

803

804 **Supplemental discussion related to Extended Data Figure 6.**

805 Melanocyte development has primarily been studied using non-human model organisms<sup>3</sup> or employing *in*  
806 *vitro* differentiation of human pluripotent stem cells<sup>19</sup>. Gene signatures that define stages of melanocyte  
807 differentiation have been identified in these systems, including mouse CD34+ follicular melanocyte stem cells and  
808 melanoblasts<sup>15,16</sup> and *in vitro* human embryonic stem cells, neural crest cells, melanoblasts, and differentiated  
809 melanocytes<sup>50</sup>. “Melanoblast” is a designation used to describe committed immature melanocytes along a broad  
810 range of developmental time points - from initial commitment to melanocyte fate, which occurs prior to epidermal  
811 infiltration through hair follicle morphogenesis, and along two distinct lineage specification pathways<sup>3</sup>. Given the  
812 fetal ages sampled here, we expected observation of *in vivo* human melanoblasts (Extended Data Fig. 7a). If the  
813 transcriptional programs of developing melanocytes were conserved from the model systems to *in vivo* human  
814 development, we would have expected substantial enrichment for the model system gene sets in the corresponding  
815 developmental stage. It was therefore surprising that the published mouse CD34+ melanocyte stem cell signature  
816 was the only signature to have relatively high and unique expression within the corresponding human  
817 developmental stage profiled here. The observed discordance could have several sources: species-, condition-, or  
818 isolation method- specific differences, differences between scRNAseq and bulk mRNAseq, differences in timescale  
819 of skin development between species, and/or the type of analysis used to generate the final gene signature.

820 Both the Sennet *et al.* E14.5 melanoblast signature (Extended Data Fig.7b) and the Rezza *et al.* P4 & P5  
821 melanocyte signatures (Extended Data Fig.7d) were more highly expressed in the FET, NEO and ADT melanocytes  
822 compared to MSCs. In these studies, melanocytic cells were isolated using LEF1 and CKIT expression, and the gene  
823 signatures were derived from the comparison of melanocytic cells to other skin cells. In mice, LEF1 is a marker of  
824 differentiated (and differentiating) melanocytes and is not expressed in MSCs<sup>51,52</sup>. Thus, the resulting gene  
825 signatures represent a general melanocytic cell-type specific program, exclusive of MSCs, at each mouse  
826 developmental time point. The observed low program expression in the human MSC group defined in the current  
827 study is therefore consistent with the experimental design for the Sennet and Rezza studies (Extended Data  
828 Fig.7b,d). In contrast, the Marie *et al.* melanoblast signature (Extended Data Fig.7c) was derived from the  
829 comparison of DCT+ melanoblasts at E15.5 & E17.5 to P1 & P7 melanocytes, and is therefore a melanoblast specific  
830 signature. DCT is expressed in differentiated (and differentiating) melanocytes as well as MSCs. Unlike the Sennet  
831 *et al.* melanoblast signature, the Marie *et al.* melanoblast signature had decreased expression within more  
832 differentiated developmental ages, which is to be expected (Extended Data Fig. 7c). Interestingly, the MSC group  
833 had the highest expression. Mouse hair follicle morphogenesis occurs around E14 and is completed postnatally by  
834 P8 as a fully mature hair-bearing follicle in anagen phase<sup>45</sup>. In humans, hair follicle formation is reported to start  
835 around 10 f.w. with mature hair follicles appearing around 20 f.w. depending on anatomic location and study<sup>43,44</sup>.  
836 The fetal skin specimens in our dataset coincide with the onset and later stages of human hair follicle development,  
837 which would encompass morphological stages that resemble mouse hair follicle development at E15.5 and E17.5  
838 from Marie *et al.* Unlike mice, human hair-bearing skin contains both hair follicle-associated and epidermal-  
839 associated melanocytes. Therefore it is reasonable that the mouse melanoblast-specific program from Marie *et al.*  
840 is most highly expressed in a subset of the human fetal melanocytes that express known follicular-associated gene  
841 signatures (Extended Data Fig.3g and 7c,e).

842 The *in vitro* derived mature melanocyte gene set was most highly expressed in all groups, with enrichment  
843 among FET, NEO, and ADT melanocytes (Extended Data Fig7f). These observations suggest that *in vitro* generation  
844 of melanocytes from pluripotent stem cells does not distinguish between differentiating, young and aged  
845 melanocytes. Differentiation protocols that better distinguish the *in vivo* profiles reported here, especially  
846 accounting for the effect of the aged adult developmental state, would be a valuable tool for the field.  
847

### 848 **Supplemental Discussion Related to Extended Data Fig. 8**

849 A number of studies have identified transcriptional programs associated with a variety of melanoma  
850 phenotypes and patient outcomes. Here, we identified four malignant melanoma states identified through  
851 classification by the most similar human developmental stage (the MAL groups: MAL<sup>MSC</sup>, MAL<sup>FET</sup>, MAL<sup>NEO</sup>, MAL<sup>ADT</sup>).  
852 We were interested in determining whether any of the MAL group signatures overlapped with, or were enriched  
853 for, previously published transcriptional signatures. Two well established transcriptional signatures have been  
854 defined as “proliferative / MITF high ” and “invasive / AXL high”<sup>26,53</sup>. These classifications center on the average  
855 expression level of a MITF regulated transcriptional program (inclusive of MITF itself). Since increasing expression  
856 of the MITF program is thought to drive a progressively differentiated state<sup>54</sup>, we reasoned the MAL groups, derived  
857 from developmental signatures, might likewise present differential expression of the this program. In agreement  
858 with this model, the proportion of cells expressing the proliferative and MITF high programs also increased with  
859 more differentiated groups (MAL<sup>ADT</sup> and MAL<sup>NEO</sup>) as compared to the less differentiated groups (Extended Data Fig.  
860 8b-c). In particular, the MAL<sup>MSC</sup> group comprised almost entirely of invasive melanoma cells and was devoid of MITF  
861 high cells, consistent with a dedifferentiated state (Extended Data Fig. 8b-c). Corroborating this interpretation,  
862 MAL<sup>MSC</sup> cells were enriched for TCGA MITF-low signature genes and expressed higher levels of a gene signature  
863 indicative of a slow cycling cell therapeutic resistance state associated with stem cells (Extended Data Fig. 8d,e).  
864 Thus, we conclude that the stem-like melanoma cells identified here (MAL<sup>MSC</sup>) are akin to stem-like melanoma cells  
865 identified in previous studies. Interestingly, only 1 of the 14 tumors analyzed here was a treatment-naïve tumor  
866 (81) but it too contained a small MAL<sup>MSC</sup> population (approximately 11% of tumor cells), consistent with previous  
867 reports describing the presence of a stem-like dedifferentiation state prior to therapy (Extended Data Fig. 8a). We  
868 further demonstrate that this program is also expressed in healthy melanocytes (the MSC cells), including  
869 enrichment for the slow cycling cell state (Extended Data Fig. 8e) implicating the transcriptional program associated  
870 with therapy-resistant, stress-induced, slow cycling tumor cells as a pre-existing feature of MSCs from normal skin  
871 as opposed to a feature solely acquired during tumorigenesis or therapeutic exposure.

872 Previous reports have used transcriptional signatures to classify cohorts of melanomas. Most notably, the  
873 TCGA cohort<sup>55</sup> can be classified as “immune”, “keratin”, or “MITF-low”; and the Cirenajwis *et al.* cohort<sup>56</sup> as  
874 “Immune”, “Normal-like”, “Pigmented” or “Proliferative”. Based upon profiling of *in vitro* differentiation of human  
875 stem cells into melanocytes, signatures for “undifferentiated”, “neural crest like”, “transition”, and “melanocytic”  
876 have also been reported<sup>20</sup>. We reasoned that the four malignant melanoma states identified here might correspond  
877 to the three or four classification signatures reported in these aforementioned studies. As described above, we  
878 observed significant enrichment between the MAL<sup>MSC</sup> group and the TCGA MITF-low signature (Extended Data Fig.  
879 8d). We also observed significant enrichment between the MAL<sup>ADT</sup> group and the Cirenajwis *et al.* “normal-like”  
880 signature, consistent with these cells retaining a substantial component of the differentiated melanocyte program.  
881 Surprisingly, neither the MAL<sup>FET</sup> nor the MAL<sup>NEO</sup> group segregated with previously defined signatures. The MAL<sup>FET</sup>  
882 group was significantly enriched for both the TCGA immune and MITF-low signatures, whereas the MAL<sup>NEO</sup> group  
883 was not enriched for any previously defined signature. These observations suggest that categorization of malignant  
884 melanoma cells by the human developmental stage categories defined here represents a novel classification  
885 system, with the MAL<sup>MSC</sup> and MAL<sup>ADT</sup> groups reasonably aligned with previously reported MITF-low/stem cell and  
886 normal melanocytes, respectively, and the MAL<sup>FET</sup> and MAL<sup>NEO</sup> groups representing previously unreported  
887 signatures. While there was no significant enrichment for the *in vitro* differentiation based gene signatures from  
888 Tsoi *et al.* in any of the MAL groups, our analyses suggests that sequential dedifferentiation, which recapitulates  
889 the ordered cascade of differentiation in reverse, is predominant in melanoma progression (Extended Data Fig. 8a).  
890 This discovery mirrors the findings of Tsoi *et al.* which show that development of therapeutic resistance in  
891 melanoma traverses a sequential dedifferentiation trajectory<sup>19</sup>.

892  
893  
894

895 **SUPPLEMENTARY DATA**

896 **Supplementary Table 1:** Related to Fig1 and Fig 2. Donor demographics and cell counts for skin samples used for  
897 single cell RNAseq.

898  
899 **Supplementary Table 2:** Related to Fig. 2. Differentially expressed genes between donor-matched volar and non-  
900 volar cutaneous melanocytes.

901  
902 **Supplementary Table 3:** Related to Extended Data Fig. 5. Pairwise differentially expressed genes between  
903 melanocyte developmental stages.

904  
905 **Supplementary Table 4:** DevMel profile genes from Fig. 3.

906  
907 **Supplementary Table 5:** Melanoma dedifferentiation analysis gene set from Fig. 3

908  
909 **Supplementary Table 6:** SKCM group categorization of TCGA tumors in Fig. 4 and list of immune and FDA drug  
910 targets in Extended Data Fig. 8

911

912

913

914 **METHODS:**

915 **Human Subject details**

916 All skin was collected from surgical discards with informed consent and approval from the UCSF Institutional  
917 Review Board. All ages, races/ethnicities, and sexes were included in the eligibility criteria for this study. Adult tissue  
918 was obtained from surgical remnants of healthy skin taken for reconstructive surgery or from amputations with  
919 healthy skin. Neonatal foreskins were obtained after routine circumcision. Anonymous fetal specimens were  
920 obtained from elective terminations and fetal age (stated as fetal weeks) was estimated by heel-toe length<sup>37</sup>. When  
921 possible, fetal sex was determined by visual inspection using a dissecting microscope. All samples were collected in  
922 cold CO2 Independent Media (Gibco–Thermo Fisher Scientific) or Medium 154 (Gibco) with 1× Antibiotic-  
923 Antimycotic (Gibco) at 4°C until dissociation.

924

925 **Skin sample preparation**

926 Tissue dissociation was started the same day as sample acquisition. For adult and neonatal skin, the  
927 epidermis was enzymatically dissociated from the dermis with a dispase, neutral protease, grade II (Roche–Sigma-  
928 Aldrich), incubation for 14 hours at 4°C. Epidermal sheets were manually separated from the dermis, finely minced,  
929 and incubated with 0.5% trypsin (Gibco) for 3 minutes at 37°C. After manual trituration, trypsin was deactivated  
930 using ice cold soybean trypsin inhibitor (Gibco), then diluted 2:3 in ice cold Hanks' balanced salt solution, no Mg<sup>2+</sup>,  
931 no Ca<sup>2+</sup> (Gibco). The dissociated cell suspension was centrifuged at 500g, 4°C, for 4 minutes, resuspended in FACS  
932 buffer (0.1% bovine serum albumin (Sigma) and 25mM Hepes (Gibco) in Dulbecco's phosphate-buffered saline  
933 (DPBS) (Gibco)) and strained with a 70µM filter to achieve a single cell suspension. For fetal tissue, the developing  
934 epidermis was manually removed from the dermis following a 20 – 30 minute incubation with 10mM EDTA  
935 (Invitrogen), DPBS at 37°C. The resulting epidermal layer was incubated with 0.5% trypsin (Gibco) for 1 min at 37°C  
936 and manually triturated. Trypsin was deactivated using ice cold soybean trypsin inhibitor (Gibco), then diluted 2:3  
937 in ice cold Hanks' balanced salt solution (Gibco). The dissociated cell suspension was centrifuged at 500g, 4°C, for 4  
938 minutes, resuspended in FACS buffer, and strained with a 70µM filter to achieve a single cell suspension.

939

940 **FACS analysis and single cell sorting**

941 Single cell suspensions were counted, diluted to 1x10<sup>6</sup> cells/100ul with ice cold FACS buffer containing dye  
942 conjugated antibodies (anti-CKIT (104D2), 15ng/100µl (CD11705, Thermo Fisher Scientific), anti-ITGA6 (GoH3),  
943 15ng/100µl (12-0495-82, Thermo Fisher Scientific) and CD11c, 1:20 dilution (46-0116-41, Thermo Fisher Scientific))  
944 and incubated on ice for 25 minutes. Cells were washed one time with 10x volume of FACS buffer, centrifuged for  
945 2 minutes at 500g, resuspended in 30ng/mL Dapi (D3571, Molecular Probes), FACS buffer. Resuspended cells were  
946 strained through a 35 µm nylon mesh filter and kept on ice until sorted.



947 Single cells were sorted into 384-well plates using the “Ultra purity” setting on a SH800S (Sony) sorter. For  
948 a typical sort, a tube containing 0.3-1ml the pre-stained cell suspension was vortexed gently and loaded onto the  
949 FACS machine. A small number of cells were flowed at low pressure to check cell concentration and amount of  
950 debris. Then the pressure was adjusted, flow was paused, the first destination plate was unsealed and  
951 loaded. Single cells were sorted into plates by gating to exclude dead/dying cells (DAPI+) and doublets. The majority  
952 of the plate contained melanocytes (CD11c-/CKIT+) with 4 to 5 columns of basal keratinocytes (CD11c-/CKIT-  
953 /ITGA6+) and other triple negative cells such as suprabasal keratinocytes (CD11c-/CKIT-/ITGA6-). Immediately, after  
954 sorting, plates were sealed with a pre-labeled aluminum seal, centrifuged at 4°C and flash frozen on dry ice, before  
955 storage at -80 for later use.

956

#### 957 **Lysis plate preparation**

958 Lysis plates were created by dispensing 0.4 µl lysis buffer (0.5U Recombinant RNase Inhibitor (Takara Bio,  
959 2313B), 0.0625% Triton™ X-100 (Sigma, 93443-100ML), 3.125 mM dNTP mix (Thermo Fisher, R0193), 3.125 µM  
960 Oligo-dT30VN (IDT, 5’AAGCAGTGGTATCAACGCAGAGTACT30VN-3’) and 1:600,000 ERCC RNA spike-in mix (Thermo  
961 Fisher, 4456740)) into 384-well hard-shell PCR plates (Biorad HSP3901) using a Tempest liquid handler (Formulatrix).  
962 All plates were then spun down for 1 minute at 3220xg and snap frozen on dry ice. Plates were stored at -80°C until  
963 used for sorting.

964

#### 965 **cDNA synthesis and library preparation**

966 cDNA synthesis was performed using the Smart-seq2 protocol (Picelli et al., 2013, 2014). Briefly, 384-well  
967 plates containing single-cell lysates were thawed on ice followed by first strand synthesis. 0.6 µl of reaction mix  
968 (16.7 U/µl SMARTScribe Reverse Transcriptase (Takara Bio, 639538), 1.67 U/µl Recombinant RNase Inhibitor (Takara  
969 Bio, 2313B), 1.67X First-Strand Buffer (Takara Bio, 639538), 1.67 µM TSO (Exiqon, 5’-  
970 AAGCAGTGGTATCAACGCAGACTACATrGrG+G-3’), 8.33 mM DTT (Bioworld, 40420001-1), 1.67 M Betaine (Sigma,  
971 B0300-5VL), and 10 mM MgCl<sub>2</sub> (Sigma, M1028-10X1ML)) was added to each well using a Tempest liquid handler or  
972 Mosquito (TTP Labtech). Reverse transcription was carried out by incubating wells on a ProFlex 2x384 thermal-  
973 cycler (Thermo Fisher) at 42°C for 90 min and stopped by heating at 70°C for 5 min. Subsequently, 1.5 µl of PCR mix  
974 (1.67X KAPA HiFi HotStart ReadyMix (Kapa Biosystems, KK2602), 0.17 µM IS PCR primer (IDT, 5’-  
975 AAGCAGTGGTATCAACGCAGAGT-3’), and 0.038 U/µl Lambda Exonuclease (NEB, M0262L)) was added to each well  
976 with a Mantis liquid handler (Formulatrix) or Mosquito, and second strand synthesis was performed on a ProFlex  
977 2x384 thermal-cycler by using the following program: 1. 37°C for 30 minutes, 2. 95°C for 3 minutes, 3. 23 cycles of  
978 98°C for 20 seconds, 67°C for 15 seconds, and 72°C for 4 minutes, and 4. 72°C for 5 minutes. The amplified product  
979 was diluted with a ratio of 1 part cDNA to 10 parts 10mM Tris-HCl (Thermo Fisher, 15568025). 0.6 µl of diluted  
980 product was transferred to a new 384-well plate using the Viaflow 384 channel pipette (Integra). Illumina  
981 sequencing libraries were prepared as described in (Darmanis et al., 2015). Briefly, tagmentation was carried out  
982 on double-stranded cDNA using the Nextera XT Library Sample Preparation kit (Illumina, FC-131-1096). Each well  
983 was mixed with 0.8 µl Nextera tagmentation DNA buffer (Illumina) and 0.4 µl Tn5 enzyme (Illumina), then incubated  
984 at 55°C for 10 min. The reaction was stopped by adding 0.4 µl “Neutralize Tagment Buffer” (Illumina) and spinning  
985 at room temperature in a centrifuge at 3220xg for 5 min. Indexing PCR reactions were performed by adding 0.4 µl  
986 of 5 µM i5 indexing primer, 0.4 µl of 5 µM i7 indexing primer, and 1.2 µl of Nextera NPM mix (Illumina). All reagents  
987 were dispensed with the Mantis or Mosquito liquid handlers. PCR amplification was carried out on a ProFlex 2x384  
988 thermal cycler using the following program: 1. 72°C for 3 minutes, 2. 95°C for 30 seconds, 3. 12 cycles of 95°C for  
989 10 seconds, 55°C for 30 seconds, and 72°C for 1 minute, and 4. 72°C for 5 minutes. Library pooling, quality control,  
990 and sequencing. Following library preparation, wells of each library plate were pooled using a Mosquito liquid  
991 handler. Pooling was followed by two purifications using 0.7x AMPure beads (Fisher, A63881). Library quality was  
992 assessed using capillary electrophoresis on a Fragment Analyzer (Agilent) or TapeStation (Agilent), and libraries were  
993 quantified by qPCR (Kapa Biosystems, KK4923) on a CFX96 Touch Real-Time PCR Detection System (Biorad). Plate  
994 pools were normalized to 2 nM and equal volumes from library plates were mixed together to make the sequencing  
995 sample pool.

996

#### 997 **Sequencing libraries from 384-well plates**

998 Libraries were sequenced on the NextSeq or NovaSeq 6000 Sequencing System (Illumina) using 2 x 100bp  
999 paired-end reads and 2 x 8bp or 2 x 12bp index reads. NextSeq runs used high output kits, whereas NovaSeq runs  
1000 used either a 200 or 300-cycle kit (Illumina, 20012860). PhiX control library was spiked in at 1%.

### 1001 1002 **Single-cell transcriptomic processing and analysis**

1003 Single cell reads were mapped to the human reference hg38 containing ERCC sequences using STAR  
1004 aligner<sup>38</sup>. HTSeq<sup>39</sup> was used to create gene count tables. These count tables were compiled and processed using  
1005 Scanpy<sup>40</sup>. Low-quality cells were filtered based on the following criteria: number of genes < 1,250 OR number of  
1006 reads < 50,000. Each gene in the transcriptome exhibited read counts in at least 3 cells. Cells exhibiting > 2-fold  
1007 higher number of genes than average were labeled as putative doublets and removed. Iterative Louvain clustering  
1008 yielded cell type-specific clusters, which were annotated using published marker genes based on inter-cluster  
1009 differential expression analysis (two-sided Mann Whitney U test, Benjamini-Hochberg FDR < 5%). Briefly, Louvain  
1010 clustering was performed on the k-nearest neighbor graph in principle component space of scaled highly variable  
1011 genes. Cells were visualized using 2-dimensional UMAP embeddings. Cell cycle status was inferred by the mean  
1012 ranked expression of marker genes, referred to as the cell cycle program score<sup>41</sup>. Cells below the 95<sup>th</sup>-percentile of  
1013 the cell cycle program score were labeled non-cycling; conversely, cells equal to or greater than 95<sup>th</sup>-percentile of  
1014 the cell cycle program score were labeled cycling. In order to control for variance introduced by disproportionate  
1015 populations of cycling cells across groups, non-cycling cells were considered for downstream analyses. Thus,  
1016 anatomical site-specific analyses and human melanocyte differentiation programs analyses were conducted on non-  
1017 cycling cells.

### 1018 1019 **Percent v-mel and c-mel**

1020 Top-10 cutaneous and top-10 volar DEGs were identified from the site-enriched genes based on highest  
1021 median per-patient log-fold-change between cutaneous and volar samples. Individual cells were classified as v-mel  
1022 if 4 or more top-10 volar DEGs exhibited non-zero expression AND fewer than 4 top-10 cutaneous DEGs exhibited  
1023 non-zero expression. Conversely, individual cells were classified as c-mel if 4 or more top-10 cutaneous DEGs  
1024 exhibited non-zero expression AND fewer than 4 top-10 volar DEGs exhibited non-zero expression. Percent v-mel  
1025 and c-mel were then calculated for each skin specimen of unique anatomical location from each individual patient.

1026 To determine the percent of HPGD positive melanocytes in tissue sections, melanocytes (TYRP1+ cells)  
1027 were manually counted. Fraction of cells was determined by the number of HPGD+ TYRP1+ cells divided by the  
1028 total number of TYRP1+ cells from each fixed frozen section. To quantify the number of NTRK2 and HPGD foci per  
1029 DCT+ cells from the RNAscope data, images were processed to correct for Opal 570 (HPGD) bleed-through into the  
1030 Opal 620 (NTRK2) channel. After bleed-through correction, DCT and associated dapi signal was used to define the  
1031 area of DCT+ cells. NTRK2 and HPGD foci within DCT+ cells were then manually counted manually. All Image analysis  
1032 was performed in Fiji (<http://fiji.sc/>)

### 1033 1034 **Immunofluorescence**

1035 Skin samples were fixed in 4% paraformaldehyde (Electron Microscopy Sciences) at 4 °C overnight, washed  
1036 with cold DPBS prior to paraffin or OCT embedding. Fixed frozen skin sections were incubated in blocking buffer:  
1037 2.5% donkey serum, 2.5% goat serum (Jackson ImmunoResearch Laboratories), 1% bovine serum albumin (Sigma-  
1038 Aldrich), and 0.1% Triton X-100 (Sigma-Aldrich) for 1–2 hours at room temperature. The following primary  
1039 antibodies were used at the indicated concentration in blocking buffer overnight at 4°C: mouse monoclonal anti-  
1040 TYRP1 1:200 (TA99, ab3312, Abcam), mouse monoclonal anti-CKIT 1:100 (CD11700, Invitrogen–Thermo Fisher  
1041 Scientific), rabbit polyclonal anti-HPGD 1:100 (HPA005679, Sigma-Aldrich). Secondary antibodies against mouse IgG,  
1042 or rabbit IgG conjugated to DyLight 488 or 594 (Thermo Fisher Scientific) were used at a 1:1,000 dilution for 1–2 h  
1043 at room temperature followed by Dapi, 1:1000 (Molecular Probes) for 1 minute. Sections were mounted in  
1044 VECTASHIELD Vibrance (Vector Laboratories) prior to imaging.

1045 Immunofluorescence images were acquired using Nikon NIS-Elements multi-platform acquisition software  
1046 on an fully automated Nikon Ti-E inverted microscope with an Apo TIRF, 60x, 1.49 NA, oil objective (Nikon) and a  
1047 Clara CCD camera (Andor).

### 1048 1049 **Multiplex RNA-FISH**

We performed Multiplex RNA-FISH using the RNAscope Assay RNAscope Multiplex Fluorescent V2 assay (Bio-technie, Cat. No. 323110) kit according to manufacturer's protocol on 10  $\mu$ M FFPE tissue sections. Tissues were stained using probes purchased from ACD for *HPGD* (Channel 1), *NTRK2* (Channel 2), *DCT* (Channel 3) and TSA Opal 570 (Channel 1, Akoya Biosciences, Cat. No. FP1488001KT), TSA Opal 620 (Channel 2, Akoya Biosciences, Cat. No. FP1488001KT) and TSA Opal 690 (Channel 3, Akoya Biosciences, Cat. No. FP1497001KT). TSA was used at a 1:1500 dilution. Cells were counterstained with DAPI and mounted with Prolong Gold Antifade Mountant (Thermo Fisher, P36930). Tissues were imaged using an Leica DMI8 microscope.

### Diffusion Pseudotime

Diffusion pseudotime analysis on all non-cycling melanocyte cells was performed using the `scanpy.tl.dpt` function. The pseudotime reference root cell was chosen from the youngest sample (9.5 f.w.). The diffusion map was computed from an  $n=30$  neighborhood graph with a Gaussian kernel.

### Single cell developmental stage melanocyte (DevMel) logistic regression model

Input data was composed of single cell transcriptomes from the following 4 groups: MSC, FET, NEO and ADT. The input examples were randomly sampled and the number of examples was balanced among all labels. The combination of normal and melanoma transcriptomes was used to scale and center the data. The input data was split into testing and training partitions at a ratio 33:67. We implemented elasticnet regularization with an  $l1$  ratio = 0.8. Single cell transcriptomes were evaluated by the model to yield a developmental stage label.

### Classification of genes in melanoma dedifferentiation categories

Logistic regression variables and top-100 differentially expressed genes for each melanoma cell population grouped by DevMel label were used in subsequent dedifferentiation pathway analysis. DevMel group mean ranked expression was compared between normal and melanoma datasets to determine pathway based on the following criteria:

Direct dedifferentiation: All cancer DevMel group  $\geq$  mean normal non-ADT DevMel group, 4-fold normal ADT DevMel group  $<$  mean normal non-ADT DevMel group

Sequential dedifferentiation: Max cancer DevMel group  $=$  Max normal DevMel group

Melanoma-specific: For each, cancer DevMel group  $>$  corresponding normal DevMel group, All cancer DevMel groups  $>$  40<sup>th</sup>-percentile of expression, All normal DevMel groups  $<$  10<sup>th</sup>-percentile of expression

Normal-specific: For each, cancer DevMel group  $<$  corresponding normal DevMel group, All cancer DevMel groups  $<$  10<sup>th</sup>-percentile of expression, All normal DevMel groups  $>$  15<sup>th</sup>-percentile of expression

Down regulated: All cancer DevMel group  $\leq$  mean normal non-ADT DevMel group, Normal ADT DevMel group  $>$  1.5-fold mean normal non-ADT DevMel group

Not-readopted: All cancer DevMel group  $\leq$  normal ADT DevMel group, 1.5-fold normal ADT DevMel group  $<$  mean normal non-ADT DevMel group

### Bulk tumor deconvolution

CIBERSORT<sup>29</sup> was used to deconvolve bulk RNA-seq from the SKCM-TCGA cohort. As input, CIBERSORT requires cell type-labeled transcriptomes to estimate the proportion of each cell type in a bulk RNA-seq sample. Here, trimmed both single cell and bulk RNA-seq transcriptomes to include only genes that are shared in both datasets. Adopting a k-fold cross-validation approach, we prepared 10 sets of single cell input transcriptomes from normal melanocytes across 4 developmental stages: MSC, FET, NEO and ADT (balanced cell counts across all labels). Each input transcriptome set was used to devolve the SKCM-TCGA bulk RNA-seq samples, yielding 10 estimates of cell proportion. For each individual sample in the SKCM-TCGA dataset, the label means were used as the final estimate of label proportion. Hierarchical clustering was used to group SKCM-TCGA samples based on similar label proportions. One-sided Fisher Exact test was used to determine significant enrichment between two gene lists. The lifelines python package (10.5281/zenodo.3833188) was used to create Kaplan-Meier survival plots and perform logrank tests using curated SKCM-TCGA metadata<sup>42</sup>.

### Data availability

Jupyter notebooks with detailed analysis scripts are available at: [github.com/czbiohub/human\\_melanocytes](https://github.com/czbiohub/human_melanocytes)

L103 GEO: GSE151091  
L104 Bioproject: PRJNA625154  
L105 SAMN14593853 : A1015LM  
L106 SAMN14593854 : 12WKM01  
L107 SAMN14593855 : FS043\_LM  
L108 SAMN14593856 : A1011L  
L109 SAMN14593857 : A1020LM  
L110 SAMN14593858 : A1033M  
L111 SAMN14593859 : A1022M  
L112 SAMN14593860 : A1014L  
L113 SAMN14593861 : A1038LM  
L114 SAMN14593862 : A1026L  
L115 SAMN14593863 : A1021M  
L116 SAMN14593864 : FS030\_LM  
L117 SAMN14593865 : A1016LM  
L118 SAMN14593866 : A1025L  
L119 SAMN14593867 : A1017LM  
L120 SAMN14593868 : A1012M  
L121 SAMN14593869 : 18WKM06  
L122 SAMN14593870 : 12WK05  
L123 SAMN14593871 : 10WK03  
L124 SAMN14593872 : 16WKM04  
L125 SAMN14593873 : 9.5WK02  
L126 SAMN14593874 : A1046M  
L127
